# Supplementary material for: Characterization of Cronobacter sakazakii Strains Originating from Plant-Origin Foods Using Comparative Genomic Analyses and Zebrafish Infectivity Studies
Source: Microorganisms. 2022 Jul 11;10(7):1396. doi: 10.3390/microorganisms10071396 (PMC9319161; doi:10.3390/microorganisms10071396)
Supplement: Supplementary file 1 [file microorganisms-10-01396-s001.zip]

Archive with 5 entries (5 files):
- S1_Supplement Table S1. Strains _ round3.pdf
- S2_Supplemental Table S2. AMRFinder - revised.xlsx
- S3_Supplemental Table S3. Phaster final May2022.xlsx
- S4_Supplemental Table S4. COG final May2022.xlsx
- Supplemental Figures revision round 2 final.pdf
