# Supplementary material for: Characterization of Cronobacter sakazakii Strains Originating from Plant-Origin Foods Using Comparative Genomic Analyses and Zebrafish Infectivity Studies
Source: Microorganisms. 2022 Jul 11;10(7):1396. doi: 10.3390/microorganisms10071396 (PMC9319161; doi:10.3390/microorganisms10071396)
Supplement: Supplementary file 1 [file microorganisms-10-01396-s001.zip › S1_Supplement Table S1. Strains _ round3.pdf]

Supplemental Table S1. Strain information of *C. sakazakii* isolates (plant-origin foods, production environments, and clinical) used for the phylogenetic microarray and WGS analyses in this study

| Strain      | Source                 | Country     | ST <sup>a</sup> , CC <sup>b</sup> | Serotype <sup>c</sup> | NCBI<br>Accession no. | Reference                       |
|-------------|------------------------|-------------|-----------------------------------|-----------------------|-----------------------|---------------------------------|
| MOD1_LR631  | Instant oatmeal        | USA         | 4, CC4                            | CsakO:2               | PTPF000000000         | Jang et al., 2018a <sup>1</sup> |
| MOD1_LR632  | Environment            | USA         | 4, CC4                            | CsakO:2               | PTPE000000000         | Jang et al., 2018a <sup>1</sup> |
| MOD1_LR634  | Dried cut carrots      | USA         | 148, CC16                         | CsakO:1               | PTPD000000000         | Jang et al., 2018a <sup>1</sup> |
| MOD1_LR635  | Dried cut carrots      | USA         | 148, CC16                         | CsakO:1               | PTPC000000000         | Jang et al., 2018a <sup>1</sup> |
| MOD1_LR640  | Sodium caseinate       | USA         | 1, CC1                            | CsakO:1               | PTPB000000000         | Jang et al., 2018a <sup>1</sup> |
| MOD1_LR654  | Adult cereal           | USA         | 23, CC23                          | CsakO:2               | PTPA000000000         | Jang et al., 2018a <sup>1</sup> |
| MOD1_LR707  | Org <sup>d</sup> flour | USA         | 1, CC1                            | CsakO:1               | PTOZ000000000         | Jang et al., 2018a <sup>1</sup> |
| MOD1_LR708  | Org. flour             | USA         | 1, CC1                            | CsakO:1               | PTOY000000000         | Jang et al., 2018a <sup>1</sup> |
| MOD1_LR715  | Org. soy               | USA         | 4, CC4                            | CsakO:2               | PTOW000000000         | Jang et al., 2018a <sup>1</sup> |
| MOD1_LR722  | Org. soy               | USA         | 1, CC1                            | CsakO:1               | PTOV000000000         | Jang et al., 2018a <sup>1</sup> |
| MOD1_LR733  | Org. flour             | USA         | 1, CC1                            | CsakO:1               | PTOU000000000         | Jang et al., 2018a <sup>1</sup> |
| MOD1_LR752  | Honey powder           | USA         | 1, CC1                            | CsakO:1               | PTOT000000000         | Jang et al., 2018a <sup>1</sup> |
| MOD1_LR753  | Honey powder           | USA         | 31, CC31                          | CsakO:2               | PTOS000000000         | Jang et al., 2018a <sup>1</sup> |
| MOD1_LR757  | Org. flour             | USA         | 13, CC13                          | CsakO:2               | PTOR000000000         | Jang et al., 2018a <sup>1</sup> |
| MOD1_1-15   | Nuts                   | South Korea | 136                               | CsakO:2               | NITJ000000000         | Jang et al., 2018a <sup>1</sup> |
| MOD1_3-21   | Nuts                   | South Korea | 1, CC1                            | CsakO:1               | NITK000000000         | Jang et al., 2018a <sup>1</sup> |
| MOD1_5-17G  | Nuts                   | South Korea | 226, CC8                          | CsakO:1               | NITM000000000         | Jang et al., 2018a <sup>1</sup> |
| MOD1_5-20G  | Nuts                   | South Korea | 17, CC17                          | CsakO:2               | NITL000000000         | Jang et al., 2018a <sup>1</sup> |
| MOD1_5-21G  | Nuts                   | South Korea | 17, CC17                          | CsakO:2               | NIXM000000000         | Jang et al., 2018a <sup>1</sup> |
| MOD1_KW1    | Barley                 | South Korea | 93                                | ND <sup>e</sup>       | NITI000000000         | Jang et al., 2018a <sup>1</sup> |
| MOD1_KW4    | Dried seaweed          | South Korea | 73, CC73                          | ND                    | NITG000000000         | Jang et al., 2018a <sup>1</sup> |
| MOD1_KW11   | Black bean             | South Korea | 642                               | CsakO:4               | NITE000000000         | Jang et al., 2018a <sup>1</sup> |
| MOD1_KW18   | Mushroom               | South Korea | 156, CC21                         | CsakO:1               | NITC000000000         | Jang et al., 2018a <sup>1</sup> |
| MOD1_777122 | Hulled sesame seed     | India       | 198, CC52                         | CsakO:4               | PTOQ000000000         | Jang et al., 2018a <sup>1</sup> |

|                 |                                                                   |             |            |         |              |                                 |
|-----------------|-------------------------------------------------------------------|-------------|------------|---------|--------------|---------------------------------|
| MOD1_760029     | Whole grain, Corn                                                 | Puerto Rico | 40, CC40   | CsakO:4 | PTOP00000000 | Jang et al., 2018a <sup>1</sup> |
| MOD1_16MP002184 | Chocolate org. shake                                              | USA         | 40, CC40   | ND      | PTOO00000000 | Jang et al., 2018a <sup>1</sup> |
| MOD1_16MP002185 | Chocolate org. shake                                              | USA         | 3, CC3     | ND      | PTON00000000 | Jang et al., 2018a <sup>1</sup> |
| MOD1_Jor109     | Grapes                                                            | Jordan      | 643        | CsakO:2 | NITQ00000000 | Jang et al., 2018a <sup>1</sup> |
| MOD1_WNTSBCO4   | Walnut                                                            | USA         | 1, CC1     | ND      | PTOM00000000 | Jang et al., 2018a <sup>1</sup> |
| MOD1_Jor173     | Unknown spice                                                     | Jordan      | 1, CC1     | CsakO:1 | PVCG00000000 | Jang et al., 2018b <sup>2</sup> |
| MOD1_Jor146     | Liquorice                                                         | Jordan      | 3, CC3     | CsakO:2 | PVMV00000000 | Jang et al., 2018b <sup>2</sup> |
| MOD1_Jor96      | Fennel                                                            | Jordan      | 4, CC4     | CsakO:3 | PVCE00000000 | Jang et al., 2018b <sup>2</sup> |
| MOD1_Jor148     | Unknown spice                                                     | Jordan      | 4, CC4     | CsakO:2 | PVCF00000000 | Jang et al., 2018b <sup>2</sup> |
| MOD1_Jor154     | Unknown spice                                                     | Jordan      | 4, CC4     | CsakO:3 | NITP00000000 | Jang et al., 2018b <sup>2</sup> |
| MOD1_Jor178     | Chamomile                                                         | Jordan      | 4, CC4     | CsakO:3 | PVBV00000000 | Jang et al., 2018b <sup>2</sup> |
| MOD1_KW13       | Dried garlic                                                      | South Korea | 13, CC13   | CsakO:1 | NITD00000000 | Jang et al., 2018b <sup>2</sup> |
| MOD1_Jor183     | Unknown spice                                                     | Jordan      | 21, CC21   | CsakO:1 | NITN00000000 | Jang et al., 2018b <sup>2</sup> |
| MOD1_788569     | Siberian ginseng,<br><i>Eleutherom sentiocosus</i><br>Root Powder | China       | 31, CC31   | CsakO:2 | PVCL00000000 | Jang et al., 2018b <sup>2</sup> |
| MOD1_KW3        | Dried hot pepper                                                  | South Korea | 40, CC40   | CsakO:4 | NITH00000000 | Jang et al., 2018b <sup>2</sup> |
| MOD1_AS-2       | Allspice                                                          | USA         | 64, CC64   | ND      | PVCH00000000 | Jang et al., 2018b <sup>2</sup> |
| MOD1_AS-4       | Allspice                                                          | USA         | 64, CC64   | ND      | PVCI00000000 | Jang et al., 2018b <sup>2</sup> |
| MOD1_AS-13      | Allspice                                                          | USA         | 64, CC64   | ND      | PVCJ00000000 | Jang et al., 2018b <sup>2</sup> |
| MOD1_AS-15      | Allspice                                                          | USA         | 64, CC64   | ND      | NCWD00000000 | Jang et al., 2018b <sup>2</sup> |
| MOD1_Jor172     | Unknown spice                                                     | Jordan      | 64, CC64   | CsakO:2 | PVSQ00000000 | Jang et al., 2018b <sup>2</sup> |
| MOD1_O21_16     | Oregano                                                           | USA         | 99, CC99   | CsakO:1 | PVSQ00000000 | Jang et al., 2018b <sup>2</sup> |
| MOD1_O26_1      | Oregano                                                           | USA         | 99, CC99   | CsakO:1 | PVBX00000000 | Jang et al., 2018b <sup>2</sup> |
| MOD1_O21_13     | Oregano                                                           | USA         | 219, CC155 | CsakO:1 | PVBW00000000 | Jang et al., 2018b <sup>2</sup> |
| MOD1_O23mB      | Oregano                                                           | USA         | 226, CC8   | CsakO:1 | PVBZ00000000 | Jang et al., 2018b <sup>2</sup> |
| MOD1_O26_4      | Oregano                                                           | USA         | 226, CC8   | CsakO:1 | PVBY00000000 | Jang et al., 2018b <sup>2</sup> |
| MOD1_Jor20      | Unknown spice                                                     | Jordan      | 226, CC8   | CsakO:1 | PVCA00000000 | Jang et al., 2018b <sup>2</sup> |
| MOD1_Jor22      | Chamomile                                                         | Jordan      | 226, CC8   | CsakO:1 | PVCB00000000 | Jang et al., 2018b <sup>2</sup> |
| MOD1_Jor44      | Unknown spice                                                     | Jordan      | 8, CC8     | CsakO:1 | PVCC00000000 | Jang et al., 2018b <sup>2</sup> |

|                          |                                 |             |          |         |              |                                     |
|--------------------------|---------------------------------|-------------|----------|---------|--------------|-------------------------------------|
| MOD1_Jor151              | Unknown spice                   | Jordan      | 8, CC8   | CsakO:1 | PVMW00000000 | Jang et al., 2018b <sup>2</sup>     |
| MOD1_Jor93               | Unknown spice                   | Jordan      | 643      | CsakO:2 | PVCD00000000 | Jang et al., 2018b <sup>2</sup>     |
| MOD1_Jor103              | Unknown spice                   | Jordan      | 643      | CsakO:2 | NITR00000000 | Jang et al., 2018b <sup>2</sup>     |
| GP1999                   | Tomato plant rhizosphere        | Germany     | 145      | ND      | NHTW00000000 | Chase et al., 2017a <sup>3</sup>    |
| NCTC 8155                | Milk powder                     | UK          | 4, CC4   | CsakO:2 | NZ_CP012253  | Jaradat et al., 2009 <sup>4</sup>   |
| SP291                    | PIF environment                 | Ireland     | 4, CC4   | CsakO:2 | NC_020260    | Power et al. 2013 <sup>5</sup>      |
| H169-1-AC                | PIF environment                 | Switzerland | 64, CC64 | CsakO:2 | NHTV00000000 | Gopinath et al., 2018 <sup>6</sup>  |
| MOD1-H322                | PIF product                     | Switzerland | 83, CC83 | CsakO:7 | MRXM00000000 | Chase et al., 2017b <sup>7</sup>    |
| MOD1-H2399               | PIF environment, Vacuum cleaner | Switzerland | 83, CC83 | ND      | MRXI00000000 | Chase et al., 2017b <sup>7</sup>    |
| MOD1-A31                 | PIF environment, Floor drain    | Switzerland | 83, CC83 | ND      | MRXT00000000 | Chase et al., 2017b <sup>7</sup>    |
| Cro2819A3                | Mushroom                        | China       | 64, CC64 | ND      | MBSC00000000 | Zheng et al. 2017 <sup>8</sup>      |
| E772                     | Milk powder                     | France      | 64, CC64 | CsakO:2 | NHQS00000000 | Chase et al., 2017b <sup>7</sup>    |
| E788                     | Clinical                        | Ireland     | 4, CC4   | CsakO:2 | QWKN00000000 | This study                          |
| ATCC29004                | Clinical                        | USA         | 4, CC4   | CsakO:2 | QWKO00000000 | This study                          |
| CDC1121_73               | Clinical                        | USA         | 64, CC64 | CsakO:2 | MCOD00000000 | Chase et al., 2017b <sup>7</sup>    |
| 693                      | Clinical                        | France      | 13, CC13 | ND      | JOLO00000000 | Masood et al., 2015 <sup>9</sup>    |
| 700                      | Clinical                        | France      | 13, CC13 | ND      | JOLL00000000 | Masood et al., 2015 <sup>9</sup>    |
| E654                     | Clinical                        | Ireland     | 1, CC1   | CsakO:1 | NCWF00000000 | This study                          |
| Csak BAA894              | Clinical*                       | USA         | 1, CC1   | CsakO:1 | NC_009778    | Kucerova et al., 2010 <sup>10</sup> |
| 254N                     | Clinical                        | Ireland     | 1, CC1   | CsakO:1 | NCWG00000000 | This study                          |
| Csak29544 <sup>T**</sup> | Clinical                        | USA         | 8, CC8   | CsakO:1 | JMRI00000000 | NCBI <sup>11</sup>                  |
| HB04                     | Clinical                        | China       | 83, CC83 | ND      | LGRL00000000 | Cui et al. 2017 <sup>12</sup>       |

<sup>a</sup>Sequence type (ST) was determined by uploading genome assemblies to <https://pubmlst.org/cronobacter> (last accessed 10.13.2021);

<sup>b</sup>CC, clonal complex;

<sup>c</sup>Serotyping was determined by following the protocol described by Yan et al. [44].

<sup>d</sup>Org., organic;

<sup>e</sup>ND refers to a “not determined” finding for the presence of a known LPS serotype.

\*Pulsed field gel electrophoresis analysis of *C. sakazakii* BAA-894, a PIF isolate was indistinguishable from the clinical isolates that were obtained in 2001 Tennessee outbreak [15].

\*\*Csak29544<sup>T</sup> is the species type strain.

## Supplemental references

- 1) Jang, H.; Addy, N.; Ewing, L.; Jean-Gilles Beaubrun, J.; Lee, Y.; Woo, J.; Negrete, F.; Finkelstein, S.; Tall, B.D.; Lehner, A.; Eshwar, A.; Gopinath, G.R. Whole-Genome sequences of *Cronobacter sakazakii* isolates obtained from foods of plant origin and dried-food manufacturing environments. *Genome Announc.* **2018**, 6, e00223-18. <http://doi:10.1128/genomeA.00223-18>
- 2) Jang, H.; Gopinath, G.R.; Chase, H.R.; Gangiredla, J.; Eshwar, A.; Patel, I.; Addy, N.; Ewing, L.; Beaubrun, J.J.G.; Negrete, F.; Finkelstein, S.; Woo, J.; Lee, Y.; Jaradat, Z.W.; Seo, K.; Fanning, S.; Stephan, R.; Lehner, A.; Tall, B.D. Draft genomes of *Cronobacter sakazakii* strains isolated from dried spices bring unique insights into the epidemiology of plant-associated strains. *Std. Genomics Sciences.* **2018**, 13, 35. <https://doi.org/10.1186/s40793-018-0339-6>
- 3) Chase, H.R.; Eberl, L.; Stephan, R.; Jeong, H.; Lee, C.; Finkelstein, S.; Negrete, F.; Gangiredla, J.; Patel, I.; Tall, B.D.; Gopinath, G.R.; Lehner, A. Draft genome sequence of *Cronobacter sakazakii* GP1999, sequence type 145, an epiphytic isolate obtained from the tomato's rhizoplane/rhizosphere continuum. *Genome Announc.* **2017**, 5, e00723-17. <https://doi.org/10.1128/genomeA.00723-17>.
- 4) Jaradat, Z.W.; Ababneh, Q.O.; Saadoun, I.M.; Samara, N.A.; Rashdan, A.M. Isolation of *Cronobacter* spp. (formerly *Enterobacter sakazakii*) from infant food, herbs and environmental samples and the subsequent identification and confirmation of the isolates using biochemical, chromogenic assays, PCR and 16S rRNA sequencing. *BMC Microbiol.* **2009**, 9, 225. <https://doi.org/10.1186/1471-2180-9-225>.
- 5) Power, K.A.; Yan, Q.; Fox, E.M.; Cooney, S.; Fanning, S. Genome sequence of *Cronobacter sakazakii* SP291, a persistent thermotolerant isolate derived from a factory producing powdered infant formula. *Genome Announc.* **2013**, 1, e00082-13.
- 6) Gopinath, G.R.; Chase, H.R.; Gangiredla, J.; Eschwar, A.; Jang, H.; Patel, I.; Negrete, F.; Finkelstein, S.; Park, E.; Chung, T.; et al. Genomic characterization of malonate positive *Cronobacter sakazakii* serotype O:2, sequence type 64 strains, isolated from clinical, food, and environment samples. *Gut Pathog.* **2018**, 10, 11. <https://doi.org/10.1186/s13099-018-0238-9>.
- 7) Zeng, H.; Zhang, J.; Li, C.; Xie, T.; Ling, N.; Wu, Q.; Ye, Y. The driving force of prophages and CRISPR-Cas system in the evolution of *Cronobacter sakazakii*. *Sci. Rep.* **2017**, 7, 40206.
- 8) Chase, H.R.; Gopinath, G.R.; Eshwar, A.K.; Stoller, A.; Fricker-Feer, C.; Gangiredla, J.; Patel, I.R.; Cinar, H.N.; Jeong, H.; Lee, C.; Negrete, F.; Finkelstein, S.; Stephan, R.; Tall, B.D.; Lehner, A. Comparative genomic characterization of the highly persistent and potentially virulent *Cronobacter sakazakii* ST83, CC65 strain H322 and other ST83 strains. *Front Microbiol.* **2017**, 8, 1136. <http://doi:10.3389/fmicb.2017.01136>
- 9) Masood N, Moore K, Farbos A, Paszkiewicz K, Dickins B, McNally A, Forsythe S. Genomic dissection of the 1994 *Cronobacter sakazakii* outbreak in a French neonatal intensive care unit. *BMC Genomics.* 2015 Oct 5;16:750. doi: 10.1186/s12864-015-1961-y.

- 10) Kucerova, E.; Clifton, S.W.; Xia, X.Q.; et al. Genome sequence of *Cronobacter sakazakii* BAA-894 and comparative genomic hybridization analysis with other *Cronobacter* species. *PLoS One*. **2010** 5, e9556. <http://doi:10.1371/journal.pone.0009556>.
- 11) NCBI\* - Search with Accession No. at <https://www.ncbi.nlm.nih.gov/nuccore/>
- 12) Cui, J.H.; Yu, B.; Xiang, Y.; Zhang, Z.; Zhang, T.; Zeng, Y.C.; Cui, Z.G.; Huo, X.X. Two cases of multi-antibiotic resistant *Cronobacter* spp. infections of infants in China. *Biomed. Environ. Sci.* **2017**, 30, 601–605.
