# Supplementary material for: Characterization of Cronobacter sakazakii Strains Originating from Plant-Origin Foods Using Comparative Genomic Analyses and Zebrafish Infectivity Studies
Source: Microorganisms. 2022 Jul 11;10(7):1396. doi: 10.3390/microorganisms10071396 (PMC9319161; doi:10.3390/microorganisms10071396)
Supplement: Supplementary file 1 [file microorganisms-10-01396-s001.zip › S2_Supplemental Table S2. AMRFinder - revised.xlsx]

## Sheet: Sheet1
Supplemental Table S2. Antibiotic resistance genes identified in 88 plant-associated C. sakazakii genomes and 2 positive controls of p505108-MDR (KY978628.1) and p505108-NDM (KY978629.1) by CFSAN's GalaxyTrakR AMR finder tool.
Contig id	Start	Stop	Size (bp)	Strand	Gene symbol	Sequence name	Scope	Element type	Element subtype	Class	Subclass	Method	Target length	Reference sequence length	% Coverage of reference sequence	% Identity to reference sequence	Alignment length	Accession of closest sequence	Name of closest sequence	HMM id	HMM description
KY978629.1	17563	17925	362	-	ble	bleomycin binding protein Ble-MBL	core	AMR	AMR	BLEOMYCIN	BLEOMYCIN	EXACTX	121	121	100	100	121	WP_004201167.1	bleomycin binding protein Ble-MBL	NF012202.0	bleomycin binding protein Ble-MBL
KY978629.1	17932	18741	809	-	blaNDM-1	subclass B1 metallo-beta-lactamase NDM-1	core	AMR	AMR	BETA-LACTAM	CARBAPENEM	ALLELEX	270	270	100	100	270	WP_004201164.1	subclass B1 metallo-beta-lactamase NDM-1	NF000259.2	NDM family subclass B1 metallo-beta-lactamase
KY978629.1	9327	10184	857	-	blaSHV-12	class A extended-spectrum beta-lactamase SHV-12	core	AMR	AMR	BETA-LACTAM	BETA-LACTAM	ALLELEX	286	286	100	100	286	WP_002904004.1	class A extended-spectrum beta-lactamase SHV-12	NF000285.3	SHV family class A beta-lactamase
lcl|KY978628.1_cds_ASR81884.1_123	1	858	857	+	blaTEM-1	class A broad-spectrum beta-lactamase TEM-1	core	AMR	AMR	BETA-LACTAM	BETA-LACTAM	ALLELEX	286	286	100	100	286	WP_000027057.1	class A broad-spectrum beta-lactamase TEM-1	NF000531.2	TEM family class A beta-lactamase
lcl|KY978628.1_cds_ASR81889.1_128	1	567	566	+	dfrA19	trimethoprim-resistant dihydrofolate reductase DfrA19	core	AMR	AMR	TRIMETHOPRIM	TRIMETHOPRIM	EXACTX	189	189	100	100	189	WP_000019304.1	trimethoprim-resistant dihydrofolate reductase DfrA19	NF000041.1	trimethoprim-resistant dihydrofolate reductase DfrA19
lcl|KY978628.1_cds_ASR81891.1_130	1	801	800	+	aph(3'')-Ib	aminoglycoside O-phosphotransferase APH(3'')-Ib	core	AMR	AMR	AMINOGLYCOSIDE	STREPTOMYCIN	EXACTX	267	267	100	100	267	WP_001082319.1	aminoglycoside O-phosphotransferase APH(3'')-Ib	NF032895.1	aminoglycoside O-phosphotransferase APH(3'')-Ib
lcl|KY978628.1_cds_ASR81892.1_131	1	834	833	+	aph(6)-Id	aminoglycoside O-phosphotransferase APH(6)-Id	core	AMR	AMR	AMINOGLYCOSIDE	STREPTOMYCIN	EXACTX	278	278	100	100	278	WP_000480968.1	aminoglycoside O-phosphotransferase APH(6)-Id	NF012171.0	APH(6)-I family aminoglycoside O-phosphotransferase
lcl|KY978628.1_cds_ASR81904.1_143	1	1617	1616	+	mcr-9.1	phosphoethanolamine--lipid A transferase MCR-9.1	core	AMR	AMR	COLISTIN	COLISTIN	ALLELEX	539	539	100	100	539	WP_001572373.1	phosphoethanolamine--lipid A transferase MCR-9.1	NF033836.1	MCR-9 family phosphoethanolamine--lipid A transferase
lcl|KY978628.1_cds_ASR81938.1_177	1	813	812	+	aph(3')-Ia	aminoglycoside O-phosphotransferase APH(3')-Ia	core	AMR	AMR	AMINOGLYCOSIDE	KANAMYCIN	EXACTX	271	271	100	100	271	WP_012695470.1	aminoglycoside O-phosphotransferase APH(3')-Ia	NF033059.2	APH(3')-I family aminoglycoside O-phosphotransferase
lcl|KY978628.1_cds_ASR82002.1_241	1	639	638	+	catA2	type A-2 chloramphenicol O-acetyltransferase CatII	core	AMR	AMR	PHENICOL	CHLORAMPHENICOL	EXACTX	213	213	100	100	213	WP_001011939.1	type A-2 chloramphenicol O-acetyltransferase CatII	NF000491.1	type A chloramphenicol O-acetyltransferase
lcl|KY978628.1_cds_ASR82007.1_246	1	1182	1181	+	tet(D)	tetracycline efflux MFS transporter Tet(D)	core	AMR	AMR	TETRACYCLINE	TETRACYCLINE	EXACTX	394	394	100	100	394	WP_001039466.1	tetracycline efflux MFS transporter Tet(D)	NF012186.0	tetracycline efflux MFS transporter Tet(D)
lcl|KY978628.1_cds_ASR82016.1_255	1	552	551	+	aac(6')-Ib3	aminoglycoside N-acetyltransferase AAC(6')-Ib3	core	AMR	AMR	AMINOGLYCOSIDE	AMINOGLYCOSIDE	ALLELEX	184	184	100	100	184	WP_032488579.1	aminoglycoside N-acetyltransferase AAC(6')-Ib3	NF033074.0	AAC(6')-Ib family aminoglycoside 6'-N-acetyltransferase
lcl|KY978628.1_cds_ASR82020.1_259	1	858	857	+	blaSHV-12	class A extended-spectrum beta-lactamase SHV-12	core	AMR	AMR	BETA-LACTAM	BETA-LACTAM	ALLELEX	286	286	100	100	286	WP_002904004.1	class A extended-spectrum beta-lactamase SHV-12	NF000285.3	SHV family class A beta-lactamase
lcl|KY978628.1_cds_ASR82027.1_266	1	837	836	+	sul1	sulfonamide-resistant dihydropteroate synthase Sul1	core	AMR	AMR	SULFONAMIDE	SULFONAMIDE	EXACTX	279	279	100	100	279	WP_000259031.1	sulfonamide-resistant dihydropteroate synthase Sul1	NF000294.1	sulfonamide-resistant dihydropteroate synthase Sul1
lcl|KY978628.1_cds_ASR82029.1_268	1	1137	1136	+	blaDHA-1	class C beta-lactamase DHA-1	core	AMR	AMR	BETA-LACTAM	CEPHALOSPORIN	ALLELEX	379	379	100	100	379	WP_004236386.1	class C beta-lactamase DHA-1	NF012102.1	DHA family class C beta-lactamase
lcl|KY978628.1_cds_ASR82037.1_276	4	645	641	+	qnrB4	quinolone resistance pentapeptide repeat protein QnrB4	core	AMR	AMR	QUINOLONE	QUINOLONE	ALLELEX	214	214	100	100	214	WP_017900990.1	quinolone resistance pentapeptide repeat protein QnrB4	NF000420.1	QnrB family quinolone resistance pentapeptide repeat protein
lcl|KY978628.1_cds_ASR82046.1_285	1	837	836	+	sul1	sulfonamide-resistant dihydropteroate synthase Sul1	core	AMR	AMR	SULFONAMIDE	SULFONAMIDE	EXACTX	279	279	100	100	279	WP_000259031.1	sulfonamide-resistant dihydropteroate synthase Sul1	NF000294.1	sulfonamide-resistant dihydropteroate synthase Sul1
lcl|KY978628.1_cds_ASR82047.1_286	1	345	344	+	qacEdelta1	quaternary ammonium compound efflux SMR transporter QacE delta 1	core	STRESS	BIOCIDE	QUATERNARY AMMONIUM	QUATERNARY AMMONIUM	ALLELEX	115	115	100	100	115	WP_000679427.1	quaternary ammonium compound efflux SMR transporter QacE delta 1	NF000276.2	quaternary ammonium compound efflux SMR transporter QacE
lcl|KY978628.1_cds_ASR82049.1_288	1	393	392	+	arr	NAD(+)--rifampin ADP-ribosyltransferase	core	AMR	AMR	RIFAMYCIN	RIFAMYCIN	BLASTX	131	137	95.62	100	131	WP_012695486.1	NAD(+)--rifampin ADP-ribosyltransferase	NF000066.1	NAD(+)--rifampin ADP-ribosyltransferase
lcl|KY978628.1_cds_ASR82050.1_289	1	807	806	+	aac(3)-II	AAC(3)-II family aminoglycoside N-acetyltransferase	core	AMR	AMR	AMINOGLYCOSIDE	GENTAMICIN	EXACTX	269	269	100	100	269	WP_012695485.1	AAC(3)-II family aminoglycoside N-acetyltransferase	NF033080.0	AAC(3)-II family aminoglycoside N-acetyltransferase
lcl|KY978628.1_cds_ASR82052.1_291	1	579	578	+	aac(6')-IIc	aminoglycoside N-acetyltransferase AAC(6')-IIc	core	AMR	AMR	AMINOGLYCOSIDE	GENTAMICIN/KANAMYCIN/TOBRAMYCIN	EXACTX	193	193	100	100	193	WP_012695484.1	aminoglycoside N-acetyltransferase AAC(6')-IIc	NF000135.2	aminoglycoside N-acetyltransferase AAC(6')-IIc
LR643_contig_9	54913	56037	1124	-	blaCSA	CSA family class C beta-lactamase	core	AMR	AMR	BETA-LACTAM	CEPHALOTHIN	BLASTX	375	375	100	98.67	375	WP_007888761.1	class C beta-lactamase CSA-1	NF033698.1	CSA family class C beta-lactamase
LR641_contig_1	168572	169696	1124	+	blaCSA	CSA family class C beta-lactamase	core	AMR	AMR	BETA-LACTAM	CEPHALOTHIN	BLASTX	375	375	100	98.93	375	WP_007888761.1	class C beta-lactamase CSA-1	NF033698.1	CSA family class C beta-lactamase
LR640_contig_20	288694	289818	1124	-	blaCSA	CSA family class C beta-lactamase	core	AMR	AMR	BETA-LACTAM	CEPHALOTHIN	BLASTX	375	375	100	98.67	375	WP_004384957.1	class C beta-lactamase CSA-2	NF033698.1	CSA family class C beta-lactamase
LR639_contig_18	117879	119003	1124	+	blaCSA	CSA family class C beta-lactamase	core	AMR	AMR	BETA-LACTAM	CEPHALOTHIN	BLASTX	375	375	100	98.67	375	WP_004384957.1	class C beta-lactamase CSA-2	NF033698.1	CSA family class C beta-lactamase
LR637_contig_5	92328	93452	1124	+	blaCSA	CSA family class C beta-lactamase	core	AMR	AMR	BETA-LACTAM	CEPHALOTHIN	BLASTX	375	375	100	98.93	375	WP_007888761.1	class C beta-lactamase CSA-1	NF033698.1	CSA family class C beta-lactamase
LR636_contig_17	281212	282336	1124	-	blaCSA	CSA family class C beta-lactamase	core	AMR	AMR	BETA-LACTAM	CEPHALOTHIN	BLASTX	375	375	100	98.93	375	WP_007888761.1	class C beta-lactamase CSA-1	NF033698.1	CSA family class C beta-lactamase
LR635_contig_4	169784	170908	1124	+	blaCSA	CSA family class C beta-lactamase	core	AMR	AMR	BETA-LACTAM	CEPHALOTHIN	BLASTX	375	375	100	98.93	375	WP_007888761.1	class C beta-lactamase CSA-1	NF033698.1	CSA family class C beta-lactamase
LR634_contig_4	448630	449754	1124	-	blaCSA	CSA family class C beta-lactamase	core	AMR	AMR	BETA-LACTAM	CEPHALOTHIN	BLASTX	375	375	100	98.93	375	WP_007888761.1	class C beta-lactamase CSA-1	NF033698.1	CSA family class C beta-lactamase
LR632_contig_37	416659	417783	1124	+	blaCSA-2	class C beta-lactamase CSA-2	core	AMR	AMR	BETA-LACTAM	CEPHALOTHIN	ALLELEX	375	375	100	100	375	WP_004384957.1	class C beta-lactamase CSA-2	NF033698.1	CSA family class C beta-lactamase
LR631_contig_2	1206881	1208005	1124	+	blaCSA-2	class C beta-lactamase CSA-2	core	AMR	AMR	BETA-LACTAM	CEPHALOTHIN	ALLELEX	375	375	100	100	375	WP_004384957.1	class C beta-lactamase CSA-2	NF033698.1	CSA family class C beta-lactamase
LR627_contig_32	26027	27151	1124	-	blaCSA	CSA family class C beta-lactamase	core	AMR	AMR	BETA-LACTAM	CEPHALOTHIN	BLASTX	375	375	100	98.67	375	WP_004384957.1	class C beta-lactamase CSA-2	NF033698.1	CSA family class C beta-lactamase
LR626_contig_5	1231808	1232932	1124	-	blaCSA	CSA family class C beta-lactamase	core	AMR	AMR	BETA-LACTAM	CEPHALOTHIN	BLASTX	375	375	100	98.67	375	WP_004384957.1	class C beta-lactamase CSA-2	NF033698.1	CSA family class C beta-lactamase
LR607_contig_6	222673	223797	1124	-	blaCSA	CSA family class C beta-lactamase	core	AMR	AMR	BETA-LACTAM	CEPHALOTHIN	BLASTX	375	375	100	97.87	375	WP_007888761.1	class C beta-lactamase CSA-1	NF033698.1	CSA family class C beta-lactamase
KW18_contig_7	172415	173539	1124	+	blaCSA	CSA family class C beta-lactamase	core	AMR	AMR	BETA-LACTAM	CEPHALOTHIN	BLASTX	375	375	100	98.67	375	WP_004384957.1	class C beta-lactamase CSA-2	NF033698.1	CSA family class C beta-lactamase
KW13_contig_5	790570	791694	1124	-	blaCSA	CSA family class C beta-lactamase	core	AMR	AMR	BETA-LACTAM	CEPHALOTHIN	BLASTX	375	375	100	97.87	375	WP_007888761.1	class C beta-lactamase CSA-1	NF033698.1	CSA family class C beta-lactamase
KW11_contig_2	156870	157994	1124	+	blaCSA	CSA family class C beta-lactamase	core	AMR	AMR	BETA-LACTAM	CEPHALOTHIN	BLASTX	375	375	100	98.67	375	WP_007888761.1	class C beta-lactamase CSA-1	NF033698.1	CSA family class C beta-lactamase
KW9_contig_4	187103	188227	1124	-	blaCSA	CSA family class C beta-lactamase	core	AMR	AMR	BETA-LACTAM	CEPHALOTHIN	BLASTX	375	375	100	97.87	375	WP_004384957.1	class C beta-lactamase CSA-2	NF033698.1	CSA family class C beta-lactamase
KW4_contig_3	870282	871406	1124	-	blaCSA	CSA family class C beta-lactamase	core	AMR	AMR	BETA-LACTAM	CEPHALOTHIN	BLASTX	375	375	100	98.67	375	WP_007888761.1	class C beta-lactamase CSA-1	NF033698.1	CSA family class C beta-lactamase
KW3_contig_15	165617	166741	1124	+	blaCSA	CSA family class C beta-lactamase	core	AMR	AMR	BETA-LACTAM	CEPHALOTHIN	BLASTX	375	375	100	98.67	375	WP_007888761.1	class C beta-lactamase CSA-1	NF033698.1	CSA family class C beta-lactamase
KW1_contig_5	1202485	1203609	1124	+	blaCSA	CSA family class C beta-lactamase	core	AMR	AMR	BETA-LACTAM	CEPHALOTHIN	BLASTX	375	375	100	98.67	375	WP_007888761.1	class C beta-lactamase CSA-1	NF033698.1	CSA family class C beta-lactamase
Jor204_contig_8	957777	958901	1124	-	blaCSA	CSA family class C beta-lactamase	core	AMR	AMR	BETA-LACTAM	CEPHALOTHIN	BLASTX	375	375	100	97.33	375	WP_004384957.1	class C beta-lactamase CSA-2	NF033698.1	CSA family class C beta-lactamase
Jor178_contig_13	144455	145579	1124	-	blaCSA-2	class C beta-lactamase CSA-2	core	AMR	AMR	BETA-LACTAM	CEPHALOTHIN	ALLELEX	375	375	100	100	375	WP_004384957.1	class C beta-lactamase CSA-2	NF033698.1	CSA family class C beta-lactamase
Jor175_contig_2	91352	92476	1124	+	blaCSA	CSA family class C beta-lactamase	core	AMR	AMR	BETA-LACTAM	CEPHALOTHIN	BLASTX	375	375	100	98.67	375	WP_004384957.1	class C beta-lactamase CSA-2	NF033698.1	CSA family class C beta-lactamase
Jor173_contig_1	117969	119093	1124	+	blaCSA	CSA family class C beta-lactamase	core	AMR	AMR	BETA-LACTAM	CEPHALOTHIN	BLASTX	375	375	100	98.67	375	WP_004384957.1	class C beta-lactamase CSA-2	NF033698.1	CSA family class C beta-lactamase
Jor172_contig_11	111874	112998	1124	+	blaCSA	CSA family class C beta-lactamase	core	AMR	AMR	BETA-LACTAM	CEPHALOTHIN	BLASTX	375	375	100	98.93	375	WP_004384957.1	class C beta-lactamase CSA-2	NF033698.1	CSA family class C beta-lactamase
Jor151_contig_2	153226	154350	1124	+	blaCSA	CSA family class C beta-lactamase	core	AMR	AMR	BETA-LACTAM	CEPHALOTHIN	BLASTX	375	375	100	99.73	375	WP_007888761.1	class C beta-lactamase CSA-1	NF033698.1	CSA family class C beta-lactamase
Jor148_contig_6	37098	38222	1124	-	blaCSA-2	class C beta-lactamase CSA-2	core	AMR	AMR	BETA-LACTAM	CEPHALOTHIN	ALLELEX	375	375	100	100	375	WP_004384957.1	class C beta-lactamase CSA-2	NF033698.1	CSA family class C beta-lactamase
Jor146_contig_11	54651	55775	1124	-	blaCSA	CSA family class C beta-lactamase	core	AMR	AMR	BETA-LACTAM	CEPHALOTHIN	BLASTX	375	375	100	98.67	375	WP_007888761.1	class C beta-lactamase CSA-1	NF033698.1	CSA family class C beta-lactamase
Jor109_contig_30	9136	10260	1124	+	blaCSA	CSA family class C beta-lactamase	core	AMR	AMR	BETA-LACTAM	CEPHALOTHIN	BLASTX	375	375	100	97.87	375	WP_007888761.1	class C beta-lactamase CSA-1	NF033698.1	CSA family class C beta-lactamase
Jor96_contig_18	85572	86696	1124	-	blaCSA-2	class C beta-lactamase CSA-2	core	AMR	AMR	BETA-LACTAM	CEPHALOTHIN	ALLELEX	375	375	100	100	375	WP_004384957.1	class C beta-lactamase CSA-2	NF033698.1	CSA family class C beta-lactamase
Jor93_contig_4	147803	148927	1124	+	blaCSA	CSA family class C beta-lactamase	core	AMR	AMR	BETA-LACTAM	CEPHALOTHIN	BLASTX	375	375	100	97.87	375	WP_007888761.1	class C beta-lactamase CSA-1	NF033698.1	CSA family class C beta-lactamase
Jor44_contig_1	153226	154350	1124	+	blaCSA	CSA family class C beta-lactamase	core	AMR	AMR	BETA-LACTAM	CEPHALOTHIN	BLASTX	375	375	100	99.73	375	WP_007888761.1	class C beta-lactamase CSA-1	NF033698.1	CSA family class C beta-lactamase
Jor22_contig_4	155535	156659	1124	+	blaCSA-1	class C beta-lactamase CSA-1	core	AMR	AMR	BETA-LACTAM	CEPHALOTHIN	ALLELEX	375	375	100	100	375	WP_007888761.1	class C beta-lactamase CSA-1	NF033698.1	CSA family class C beta-lactamase
Jor20_contig_2	110925	112049	1124	+	blaCSA-1	class C beta-lactamase CSA-1	core	AMR	AMR	BETA-LACTAM	CEPHALOTHIN	ALLELEX	375	375	100	100	375	WP_007888761.1	class C beta-lactamase CSA-1	NF033698.1	CSA family class C beta-lactamase
Jor183_contig_57	55925	57049	1124	-	blaCSA	CSA family class C beta-lactamase	core	AMR	AMR	BETA-LACTAM	CEPHALOTHIN	BLASTX	375	375	100	98.93	375	WP_007888761.1	class C beta-lactamase CSA-1	NF033698.1	CSA family class C beta-lactamase
Jor154_contig_36	59845	60969	1124	-	blaCSA-2	class C beta-lactamase CSA-2	core	AMR	AMR	BETA-LACTAM	CEPHALOTHIN	ALLELEX	375	375	100	100	375	WP_004384957.1	class C beta-lactamase CSA-2	NF033698.1	CSA family class C beta-lactamase
Jor103_contig_17	50030	51154	1124	-	blaCSA	CSA family class C beta-lactamase	core	AMR	AMR	BETA-LACTAM	CEPHALOTHIN	BLASTX	375	375	100	97.87	375	WP_007888761.1	class C beta-lactamase CSA-1	NF033698.1	CSA family class C beta-lactamase
Jor100_contig_33	6775	7899	1124	+	blaCSA	CSA family class C beta-lactamase	core	AMR	AMR	BETA-LACTAM	CEPHALOTHIN	BLASTX	375	375	100	97.87	375	WP_007888761.1	class C beta-lactamase CSA-1	NF033698.1	CSA family class C beta-lactamase
AS15_contig_25	76380	77504	1124	+	blaCSA	CSA family class C beta-lactamase	core	AMR	AMR	BETA-LACTAM	CEPHALOTHIN	BLASTX	375	375	100	98.93	375	WP_004384957.1	class C beta-lactamase CSA-2	NF033698.1	CSA family class C beta-lactamase
AS13_contig_20	52644	53768	1124	-	blaCSA	CSA family class C beta-lactamase	core	AMR	AMR	BETA-LACTAM	CEPHALOTHIN	BLASTX	375	375	100	98.93	375	WP_004384957.1	class C beta-lactamase CSA-2	NF033698.1	CSA family class C beta-lactamase
AS4_contig_12	76607	77731	1124	+	blaCSA	CSA family class C beta-lactamase	core	AMR	AMR	BETA-LACTAM	CEPHALOTHIN	BLASTX	375	375	100	98.93	375	WP_004384957.1	class C beta-lactamase CSA-2	NF033698.1	CSA family class C beta-lactamase
AS2_contig_26	12697	13821	1124	-	blaCSA	CSA family class C beta-lactamase	core	AMR	AMR	BETA-LACTAM	CEPHALOTHIN	BLASTX	375	375	100	98.93	375	WP_004384957.1	class C beta-lactamase CSA-2	NF033698.1	CSA family class C beta-lactamase
788569_contig_8	110300	111424	1124	+	blaCSA	CSA family class C beta-lactamase	core	AMR	AMR	BETA-LACTAM	CEPHALOTHIN	BLASTX	375	375	100	99.2	375	WP_007888761.1	class C beta-lactamase CSA-1	NF033698.1	CSA family class C beta-lactamase
777122_contig_10	130189	131313	1124	-	blaCSA	CSA family class C beta-lactamase	core	AMR	AMR	BETA-LACTAM	CEPHALOTHIN	BLASTX	375	375	100	98.13	375	WP_004384957.1	class C beta-lactamase CSA-2	NF033698.1	CSA family class C beta-lactamase
760029_contig_28	920938	922062	1124	-	blaCSA	CSA family class C beta-lactamase	core	AMR	AMR	BETA-LACTAM	CEPHALOTHIN	BLASTX	375	375	100	98.67	375	WP_007888761.1	class C beta-lactamase CSA-1	NF033698.1	CSA family class C beta-lactamase
16MP2185_contig_1	117967	119091	1124	+	blaCSA	CSA family class C beta-lactamase	core	AMR	AMR	BETA-LACTAM	CEPHALOTHIN	BLASTX	375	375	100	98.67	375	WP_007888761.1	class C beta-lactamase CSA-1	NF033698.1	CSA family class C beta-lactamase
16MP2184_contig_1	565590	566714	1124	-	blaCSA	CSA family class C beta-lactamase	core	AMR	AMR	BETA-LACTAM	CEPHALOTHIN	BLASTX	375	375	100	98.67	375	WP_007888761.1	class C beta-lactamase CSA-1	NF033698.1	CSA family class C beta-lactamase
5_21G_contig_11	632526	633650	1124	+	blaCSA	CSA family class C beta-lactamase	core	AMR	AMR	BETA-LACTAM	CEPHALOTHIN	BLASTX	375	375	100	98.13	375	WP_007888761.1	class C beta-lactamase CSA-1	NF033698.1	CSA family class C beta-lactamase
5_20G_contig_2	999749	1000873	1124	-	blaCSA	CSA family class C beta-lactamase	core	AMR	AMR	BETA-LACTAM	CEPHALOTHIN	BLASTX	375	375	100	98.13	375	WP_007888761.1	class C beta-lactamase CSA-1	NF033698.1	CSA family class C beta-lactamase
5_17G_contig_8	281796	282920	1124	-	blaCSA	CSA family class C beta-lactamase	core	AMR	AMR	BETA-LACTAM	CEPHALOTHIN	BLASTX	375	375	100	99.73	375	WP_007888761.1	class C beta-lactamase CSA-1	NF033698.1	CSA family class C beta-lactamase
3_21_contig_8	118139	119263	1124	+	blaCSA	CSA family class C beta-lactamase	core	AMR	AMR	BETA-LACTAM	CEPHALOTHIN	BLASTX	375	375	100	98.67	375	WP_004384957.1	class C beta-lactamase CSA-2	NF033698.1	CSA family class C beta-lactamase
1_15_contig_2	1147972	1149096	1124	-	blaCSA	CSA family class C beta-lactamase	core	AMR	AMR	BETA-LACTAM	CEPHALOTHIN	BLASTX	375	375	100	97.87	375	WP_004384957.1	class C beta-lactamase CSA-2	NF033698.1	CSA family class C beta-lactamase
WNTSBCO4_contig_4	117924	119048	1124	+	blaCSA	CSA family class C beta-lactamase	core	AMR	AMR	BETA-LACTAM	CEPHALOTHIN	BLASTX	375	375	100	98.67	375	WP_004384957.1	class C beta-lactamase CSA-2	NF033698.1	CSA family class C beta-lactamase
WNTSBCO4_contig_4	348796	350412	1616	+	mcr-9.1	phosphoethanolamine--lipid A transferase MCR-9.1	core	AMR	AMR	COLISTIN	COLISTIN	ALLELEX	539	539	100	100	539	WP_001572373.1	phosphoethanolamine--lipid A transferase MCR-9.1	NF033836.1	MCR-9 family phosphoethanolamine--lipid A transferase
O26_4_contig_1	1105337	1106461	1124	-	blaCSA	CSA family class C beta-lactamase	core	AMR	AMR	BETA-LACTAM	CEPHALOTHIN	BLASTX	375	375	100	99.73	375	WP_007888761.1	class C beta-lactamase CSA-1	NF033698.1	CSA family class C beta-lactamase
O26_1_contig_4	27798	28922	1124	+	blaCSA	CSA family class C beta-lactamase	core	AMR	AMR	BETA-LACTAM	CEPHALOTHIN	BLASTX	375	375	100	98.4	375	WP_007888761.1	class C beta-lactamase CSA-1	NF033698.1	CSA family class C beta-lactamase
O23mB_contig_12	155223	156347	1124	+	blaCSA	CSA family class C beta-lactamase	core	AMR	AMR	BETA-LACTAM	CEPHALOTHIN	BLASTX	375	375	100	99.73	375	WP_007888761.1	class C beta-lactamase CSA-1	NF033698.1	CSA family class C beta-lactamase
O21_16_contig_7	28134	29258	1124	+	blaCSA	CSA family class C beta-lactamase	core	AMR	AMR	BETA-LACTAM	CEPHALOTHIN	BLASTX	375	375	100	98.4	375	WP_007888761.1	class C beta-lactamase CSA-1	NF033698.1	CSA family class C beta-lactamase
O21_13_contig_7	250299	251423	1124	-	blaCSA	CSA family class C beta-lactamase	core	AMR	AMR	BETA-LACTAM	CEPHALOTHIN	BLASTX	375	375	100	98.13	375	WP_007888761.1	class C beta-lactamase CSA-1	NF033698.1	CSA family class C beta-lactamase
LR757_contig_2	83137	84261	1124	-	blaCSA	CSA family class C beta-lactamase	core	AMR	AMR	BETA-LACTAM	CEPHALOTHIN	BLASTX	375	375	100	97.87	375	WP_007888761.1	class C beta-lactamase CSA-1	NF033698.1	CSA family class C beta-lactamase
LR756_contig_22	83251	84375	1124	-	blaCSA	CSA family class C beta-lactamase	core	AMR	AMR	BETA-LACTAM	CEPHALOTHIN	BLASTX	375	375	100	97.87	375	WP_007888761.1	class C beta-lactamase CSA-1	NF033698.1	CSA family class C beta-lactamase
LR755_contig_6	19209	20333	1124	-	blaCSA	CSA family class C beta-lactamase	core	AMR	AMR	BETA-LACTAM	CEPHALOTHIN	BLASTX	375	375	100	98.67	375	WP_004384957.1	class C beta-lactamase CSA-2	NF033698.1	CSA family class C beta-lactamase
LR753_contig_11	632808	633932	1124	-	blaCSA	CSA family class C beta-lactamase	core	AMR	AMR	BETA-LACTAM	CEPHALOTHIN	BLASTX	375	375	100	98.93	375	WP_007888761.1	class C beta-lactamase CSA-1	NF033698.1	CSA family class C beta-lactamase
LR752_contig_22	434603	435727	1124	+	blaCSA	CSA family class C beta-lactamase	core	AMR	AMR	BETA-LACTAM	CEPHALOTHIN	BLASTX	375	375	100	98.67	375	WP_004384957.1	class C beta-lactamase CSA-2	NF033698.1	CSA family class C beta-lactamase
LR751_contig_2	74866	75990	1124	+	blaCSA-2	class C beta-lactamase CSA-2	core	AMR	AMR	BETA-LACTAM	CEPHALOTHIN	ALLELEX	375	375	100	100	375	WP_004384957.1	class C beta-lactamase CSA-2	NF033698.1	CSA family class C beta-lactamase
LR747_contig_5	177241	178365	1124	+	blaCSA	CSA family class C beta-lactamase	core	AMR	AMR	BETA-LACTAM	CEPHALOTHIN	BLASTX	375	375	100	97.87	375	WP_007888761.1	class C beta-lactamase CSA-1	NF033698.1	CSA family class C beta-lactamase
LR745_contig_14	205600	206724	1124	+	blaCSA-2	class C beta-lactamase CSA-2	core	AMR	AMR	BETA-LACTAM	CEPHALOTHIN	ALLELEX	375	375	100	100	375	WP_004384957.1	class C beta-lactamase CSA-2	NF033698.1	CSA family class C beta-lactamase
LR736_contig_12	118019	119143	1124	+	blaCSA	CSA family class C beta-lactamase	core	AMR	AMR	BETA-LACTAM	CEPHALOTHIN	BLASTX	375	375	100	98.67	375	WP_004384957.1	class C beta-lactamase CSA-2	NF033698.1	CSA family class C beta-lactamase
LR736_contig_12	147138	148754	1616	+	mcr-9.1	phosphoethanolamine--lipid A transferase MCR-9.1	core	AMR	AMR	COLISTIN	COLISTIN	ALLELEX	539	539	100	100	539	WP_001572373.1	phosphoethanolamine--lipid A transferase MCR-9.1	NF033836.1	MCR-9 family phosphoethanolamine--lipid A transferase
LR735_contig_18	34453	35577	1124	-	blaCSA	CSA family class C beta-lactamase	core	AMR	AMR	BETA-LACTAM	CEPHALOTHIN	BLASTX	375	375	100	98.67	375	WP_004384957.1	class C beta-lactamase CSA-2	NF033698.1	CSA family class C beta-lactamase
LR735_contig_18	4842	6458	1616	-	mcr-9.1	phosphoethanolamine--lipid A transferase MCR-9.1	core	AMR	AMR	COLISTIN	COLISTIN	ALLELEX	539	539	100	100	539	WP_001572373.1	phosphoethanolamine--lipid A transferase MCR-9.1	NF033836.1	MCR-9 family phosphoethanolamine--lipid A transferase
LR733_contig_6	426616	427740	1124	-	blaCSA	CSA family class C beta-lactamase	core	AMR	AMR	BETA-LACTAM	CEPHALOTHIN	BLASTX	375	375	100	98.67	375	WP_004384957.1	class C beta-lactamase CSA-2	NF033698.1	CSA family class C beta-lactamase
LR728_contig_12	31875	32999	1124	+	blaCSA	CSA family class C beta-lactamase	core	AMR	AMR	BETA-LACTAM	CEPHALOTHIN	BLASTX	375	375	100	98.4	375	WP_004384957.1	class C beta-lactamase CSA-2	NF033698.1	CSA family class C beta-lactamase
LR723_contig_4	292590	293714	1124	-	blaCSA	CSA family class C beta-lactamase	core	AMR	AMR	BETA-LACTAM	CEPHALOTHIN	BLASTX	375	375	100	98.67	375	WP_004384957.1	class C beta-lactamase CSA-2	NF033698.1	CSA family class C beta-lactamase
LR722_contig_6	156793	157917	1124	+	blaCSA	CSA family class C beta-lactamase	core	AMR	AMR	BETA-LACTAM	CEPHALOTHIN	BLASTX	375	375	100	98.67	375	WP_004384957.1	class C beta-lactamase CSA-2	NF033698.1	CSA family class C beta-lactamase
LR721_contig_5	457398	458522	1124	-	blaCSA	CSA family class C beta-lactamase	core	AMR	AMR	BETA-LACTAM	CEPHALOTHIN	BLASTX	375	375	100	98.93	375	WP_007888761.1	class C beta-lactamase CSA-1	NF033698.1	CSA family class C beta-lactamase
LR715_contig_5	155208	156332	1124	+	blaCSA-2	class C beta-lactamase CSA-2	core	AMR	AMR	BETA-LACTAM	CEPHALOTHIN	ALLELEX	375	375	100	100	375	WP_004384957.1	class C beta-lactamase CSA-2	NF033698.1	CSA family class C beta-lactamase
LR714_contig_3	288858	289982	1124	-	blaCSA	CSA family class C beta-lactamase	core	AMR	AMR	BETA-LACTAM	CEPHALOTHIN	BLASTX	375	375	100	98.67	375	WP_004384957.1	class C beta-lactamase CSA-2	NF033698.1	CSA family class C beta-lactamase
LR713_contig_5	47806	48930	1124	-	blaCSA	CSA family class C beta-lactamase	core	AMR	AMR	BETA-LACTAM	CEPHALOTHIN	BLASTX	375	375	100	98.4	375	WP_007888761.1	class C beta-lactamase CSA-1	NF033698.1	CSA family class C beta-lactamase
LR712_contig_13	91167	92291	1124	+	blaCSA-2	class C beta-lactamase CSA-2	core	AMR	AMR	BETA-LACTAM	CEPHALOTHIN	ALLELEX	375	375	100	100	375	WP_004384957.1	class C beta-lactamase CSA-2	NF033698.1	CSA family class C beta-lactamase
LR711_contig_2	435042	436166	1124	+	blaCSA	CSA family class C beta-lactamase	core	AMR	AMR	BETA-LACTAM	CEPHALOTHIN	BLASTX	375	375	100	98.67	375	WP_004384957.1	class C beta-lactamase CSA-2	NF033698.1	CSA family class C beta-lactamase
LR708_contig_7	210811	211935	1124	+	blaCSA	CSA family class C beta-lactamase	core	AMR	AMR	BETA-LACTAM	CEPHALOTHIN	BLASTX	375	375	100	98.67	375	WP_004384957.1	class C beta-lactamase CSA-2	NF033698.1	CSA family class C beta-lactamase
LR707_contig_6	426606	427730	1124	-	blaCSA	CSA family class C beta-lactamase	core	AMR	AMR	BETA-LACTAM	CEPHALOTHIN	BLASTX	375	375	100	98.67	375	WP_004384957.1	class C beta-lactamase CSA-2	NF033698.1	CSA family class C beta-lactamase
LR706_contig_20	68569	69693	1124	-	blaCSA-2	class C beta-lactamase CSA-2	core	AMR	AMR	BETA-LACTAM	CEPHALOTHIN	ALLELEX	375	375	100	100	375	WP_004384957.1	class C beta-lactamase CSA-2	NF033698.1	CSA family class C beta-lactamase
LR705_contig_18	66421	67545	1124	-	blaCSA-2	class C beta-lactamase CSA-2	core	AMR	AMR	BETA-LACTAM	CEPHALOTHIN	ALLELEX	375	375	100	100	375	WP_004384957.1	class C beta-lactamase CSA-2	NF033698.1	CSA family class C beta-lactamase
LR704_contig_6	117923	119047	1124	+	blaCSA	CSA family class C beta-lactamase	core	AMR	AMR	BETA-LACTAM	CEPHALOTHIN	BLASTX	375	375	100	98.67	375	WP_004384957.1	class C beta-lactamase CSA-2	NF033698.1	CSA family class C beta-lactamase
LR703_contig_17	74950	76074	1124	-	blaCSA	CSA family class C beta-lactamase	core	AMR	AMR	BETA-LACTAM	CEPHALOTHIN	BLASTX	375	375	100	99.2	375	WP_007888761.1	class C beta-lactamase CSA-1	NF033698.1	CSA family class C beta-lactamase
LR702_contig_11	123778	124902	1124	+	blaCSA	CSA family class C beta-lactamase	core	AMR	AMR	BETA-LACTAM	CEPHALOTHIN	BLASTX	375	375	100	98.93	375	WP_007888761.1	class C beta-lactamase CSA-1	NF033698.1	CSA family class C beta-lactamase
LR688_contig_7	292479	293603	1124	-	blaCSA	CSA family class C beta-lactamase	core	AMR	AMR	BETA-LACTAM	CEPHALOTHIN	BLASTX	375	375	100	98.67	375	WP_004384957.1	class C beta-lactamase CSA-2	NF033698.1	CSA family class C beta-lactamase
LR654_contig_36	74007	75131	1124	+	blaCSA	CSA family class C beta-lactamase	core	AMR	AMR	BETA-LACTAM	CEPHALOTHIN	BLASTX	375	375	100	98.4	375	WP_007888761.1	class C beta-lactamase CSA-1	NF033698.1	CSA family class C beta-lactamase
LR646_contig_22	54913	56037	1124	-	blaCSA	CSA family class C beta-lactamase	core	AMR	AMR	BETA-LACTAM	CEPHALOTHIN	BLASTX	375	375	100	98.67	375	WP_007888761.1	class C beta-lactamase CSA-1	NF033698.1	CSA family class C beta-lactamase
Note: Positive control used to cross-check this prediction on AMRFinder on CFSAN GalaxyTrakr: The CFSAN Galaxy AMRFinderPlus tool correctly identified all antimicrobial genes present on C. sakazakii plasmids p505108-MDR (KY978628.1) and p505108-NDM (KY978629.1) which included the following antimicrobial resistance genes (Table 2; Supplemental Table S2): blaTEM-1/blaSHV-12/blaDHA-1/blaNDM-1/ blaSH…
