# Supplementary material for: Characterization of Cronobacter sakazakii Strains Originating from Plant-Origin Foods Using Comparative Genomic Analyses and Zebrafish Infectivity Studies
Source: Microorganisms. 2022 Jul 11;10(7):1396. doi: 10.3390/microorganisms10071396 (PMC9319161; doi:10.3390/microorganisms10071396)
Supplement: Supplementary file 1 [file microorganisms-10-01396-s001.zip › S3_Supplemental Table S3. Phaster final May2022.xlsx]

## Sheet: Results
Supplemental Table S3. Identification of prophage genomic regions within 88 plant-associated C. sakazakii using PHASTER bioinformatic tool
ST	Strain	REGION	REGION_LENGTH	COMPLETENESS(score)	SPECIFIC_KEYWORD	REGION_POSITION	TRNA_NUM	TOTAL_PROTEIN_NUM	PHAGE_HIT_PROTEIN_NUM	HYPOTHETICAL_PROTEIN_NUM	PHAGE+HYPO_PROTEIN_PERCENTAGE	BACTERIAL_PROTEIN_NUM	ATT_SITE_SHOWUP	PHAGE_SPECIES_NUM	Most Common Phage hit	FIRST_MOST_COMMON_PHAGE_NUM	FIRST_MOST_COMMON_PHAGE_PERCENTAGE	GC_PERCENTAGE
ST136	1_15	2	45.5	Intact(120)	integrase,head,terminase,portal,tail	297444-343028	0	67	53	14	100	0	Yes	31	PHAGE_Cronob_ENT47670_NC_019927(10)	10	0.1492	0.5104
	1_15	6	31.3	Intact(150)	tail,plate,lysis,head,terminase,capsid,integrase	44049-75406	0	42	38	4	100	0	Yes	4	PHAGE_Salmon_RE_2010_NC_019488(34)	34	0.8095	0.5452
	1_15	6	19.9	Questionable(70)	tail,plate,lysin	230869-250768	1	27	23	4	100	0	No	10	PHAGE_Salmon_SEN34_NC_028699(12)	12	0.4444	0.5643
ST1	3_21	9	15.1	Incomplete(20)	integrase	2075-17216	0	12	11	1	100	0	Yes	7	PHAGE_Cronob_phiES15_NC_018454(5)	5	0.4166	0.5203
	3_21	27	18.1	Questionable(90)	tail,terminase,capsid,portal	1166-19298	0	21	21	0	100	0	No	8	PHAGE_Aeromo_phiO18P_NC_009542(13)	12	0.619	0.5654
	3_21	28	52.8	Intact(94)	integrase,terminase,head,tail	51683-104501	0	85	57	28	100	0	Yes	25	PHAGE_Cronob_ENT47670_NC_019927(29)	29	0.3411	0.5066
	3_21	55	17.2	Intact(120)	lysis,terminase,portal,capsid,head,tail	1156-18452	0	30	21	9	100	0	No	13	PHAGE_Salmon_118970_sal3_NC_031940(7)	6	0.2333	0.5141
ST226, CC8	5_17G	3	32.9	Intact(150)	tail,head,portal,terminase,lysin,integrase	2982-35964	0	45	37	8	100	0	Yes	16	PHAGE_Salmon_118970_sal3_NC_031940(11)	8	0.2444	0.5215
	5_17G	4	60.5	Intact(150)	tail,plate,head,portal,terminase,lysin,integrase	3025-63603	0	78	55	23	100	0	Yes	30	PHAGE_Entero_HK542_NC_019769(11)	11	0.141	0.5421
	5_17G	5	40.7	Intact(120)	integrase,portal,terminase,capsid,tail	514941-555694	0	36	30	6	100	0	Yes	10	PHAGE_Haemop_HP2_NC_003315(18)	18	0.5	0.5579
	5_17G	9	16.2	Incomplete(50)	integrase,lysis,terminase,tail	440364-456639	0	16	10	6	100	0	Yes	8	PHAGE_Cronob_ENT47670_NC_019927(3)	3	0.1875	0.4927
	5_17G	17	49.1	Questionable(80)	tail,integrase,recombinase,terminase	1834-51029	0	84	59	25	100	0	Yes	8	PHAGE_Salmon_SSU5_NC_018843(53)	52	0.6309	0.4804
ST226, CC8	5_20G	2	49.7	Questionable(90)	terminase,portal,head,tail	49692-99486	1	72	56	16	100	0	Yes	30	PHAGE_Cronob_ENT47670_NC_019927(21)	21	0.2916	0.5082
	5_20G	5	19.8	Questionable(70)	plate,lysin,tail	58601-78480	1	26	23	3	100	0	No	10	PHAGE_Salmon_SEN34_NC_028699(13)	13	0.5	0.5639
	5_20G	7	31.7	Intact(150)	tail,plate,head,capsid,portal,terminase,lysin,integrase	308-32054	0	46	42	4	100	0	Yes	8	PHAGE_Shigel_SfII_NC_021857(34)	34	0.7391	0.5145
	5_20G	18	96.7	Intact(150)	lysin,tail,capsid,terminase,recombinase,integrase	43-96759	0	121	97	24	100	0	Yes	8	PHAGE_Salmon_SSU5_NC_018843(90)	90	0.7438	0.5116
	5_20G	23	14.6	Questionable(90)	tail,terminase,capsid,portal	806-15437	0	19	18	1	100	0	No	5	PHAGE_Haemop_HP1_NC_001697(13)	12	0.6842	0.5711
ST17, CC17	5_21G	1	50.3	Questionable(90)	terminase,portal,tail	47605-97952	1	68	56	12	100	0	Yes	32	PHAGE_Cronob_ENT47670_NC_019927(15)	15	0.2205	0.5006
	5_21G	1	19.5	Incomplete(30)	integrase,lysis	762174-781756	0	21	19	2	100	0	Yes	11	PHAGE_Cronob_phiES15_NC_018454(9)	9	0.4285	0.4634
	5_21G	1	19.3	Intact(100)	terminase,portal,capsid,head,tail,plate	780888-800203	0	21	20	1	100	0	No	6	PHAGE_Salmon_118970_sal3_NC_031940(18)	10	0.8571	0.5625
	5_21G	1	33.7	Intact(150)	transposase,head,portal,virion,protease,tail,plate	896350-930057	1	43	39	4	100	0	No	4	PHAGE_Escher_D108_NC_013594(37)	36	0.8604	0.5367
	5_21G	26	19.8	Questionable(70)	tail,plate,lysin	205174-225053	1	26	23	3	100	0	No	10	PHAGE_Salmon_SEN34_NC_028699(13)	13	0.5	0.5638
	5_21G	45	35.8	Intact(120)	lysis,plate,head,tail	249429-285238	0	45	37	8	100	0	Yes	19	PHAGE_Salmon_118970_sal3_NC_031940(19)	12	0.4222	0.5256
	5_21G	122	95.3	Intact(140)	lysin,tail,capsid,terminase,recombinase	10508-105816	0	122	99	23	100	0	No	7	PHAGE_Salmon_SSU5_NC_018843(93)	93	0.7622	0.5122
ST40, CC40	16MP2184	5	22.6	Incomplete(30)	tail,integrase	1571-24235	0	13	12	1	100	0	Yes	7	PHAGE_Cronob_ENT47670_NC_019927(6)	6	0.4615	0.5644
	16MP2184	12	43.5	Intact(150)	tail,head,portal,terminase,lysin,plate,integrase	86732-130249	1	55	46	9	100	0	Yes	27	PHAGE_Salmon_118970_sal3_NC_031940(13)	10	0.2363	0.5558
	16MP2184	15	77.7	Questionable(87)	recombinase,integrase,lysin,terminase	490-78282	1	104	84	20	100	0	Yes	8	PHAGE_Salmon_SSU5_NC_018843(76)	77	0.7307	0.4966
	16MP2184	23	14	Incomplete(30)	tail,integrase	1450-15503	0	13	11	2	100	0	Yes	8	PHAGE_Entero_Sf101_NC_027398(3)	3	0.2307	0.4921
ST3, CC3	16MP2185	1	36.5	Intact(150)	head,tail,plate,capsid,portal,terminase,integrase	322767-359340	0	52	42	10	100	0	Yes	20	PHAGE_Salmon_118970_sal3_NC_031940(20)	14	0.3846	0.5265
	16MP2185	6	40.5	Intact(150)	plate,tail,head,portal,terminase,lysis,lysin,integrase	48100-88665	0	48	44	4	100	0	Yes	19	PHAGE_Cronob_ENT39118_NC_019934(14)	14	0.2916	0.5434
	16MP2185	6	19.8	Questionable(70)	tail,plate,lysin	249311-269190	1	26	23	100	100	0	No	10	PHAGE_Salmon_SEN34_NC_028699(13)	13	0.5	0.5643
	16MP2185	15	109.8	Intact(150)	integrase,recombinase,terminase,capsid,tail,lysin	72-109969	0	137	110	27	100	0	Yes	11	PHAGE_Salmon_SSU5_NC_018843(101)	100	0.7372	0.5071
ST40, CC40	760029	3	10.7	Incomplete(50)	integrase,tail,flippase	25107-35882	0	12	10	2	100	0	Yes	7	PHAGE_Entero_Sf101_NC_027398(3)	3	0.25	0.4235
	760029	28	20.4	Incomplete(30)	integrase,lysin	157352-177797	0	26	19	7	100	0	Yes	10	PHAGE_Shigel_SfIV_NC_022749(7)	7	0.2692	0.495
	760029	9	40.4	Incomplete(20)	NA	10446-50852	0	30	14	16	100	0	Yes	8	PHAGE_Escher_RCS47_NC_042128(6)	6	0.2	0.5274
	760029	9	7.2	Incomplete(30)	plate,transposase	60579-67869	0	10	7	3	100	0	No	6	PHAGE_Salmon_SJ46_NC_031129(2)	2	0.2	0.5091
ST198, CC52	777122	1	17.7	Questionable(70)	terminase,portal,coat,capsid,head,tail	2-17784	0	18	18	0	100	0	No	13	PHAGE_Salmon_g341c_NC_013059(6)	5	0.3333	0.5213
	777122	6	9.9	Questionable(75)	head,integrase	1312-11307	0	11	7	4	100	0	Yes	1	PHAGE_Entero_P4_NC_001609(7)	7	0.6363	0.4979
	777122	22	29.7	Intact(150)	integrase,portal,terminase,capsid,tail,lysin,lysis,plate	8399-38177	0	30	26	4	100	0	Yes	9	PHAGE_Salmon_SEN1_NC_029003(15)	15	0.5	0.5298
	777122	48	12.3	Incomplete(10)	NA	909-13262	0	22	16	6	100	0	No	12	PHAGE_Cronob_ENT47670_NC_019927(5)	5	0.2272	0.5076
31, CC31	788569	4	7.2	Incomplete(30)	integrase	4461-11754	0	12	11	1	100	0	No	9	PHAGE_Cronob_phiES15_NC_018454(3)	3	0.25	0.5155
	788569	6	48	Intact(150)	integrase,terminase,head,tail	25278-73298	0	75	58	17	100	0	Yes	28	PHAGE_Cronob_ENT47670_NC_019927(16)	16	0.2133	0.5051
	788569	8	19.2	Intact(140)	head,tail,plate,capsid,portal,terminase	307824-327043	0	23	22	1	100	0	No	9	PHAGE_Salmon_118970_sal3_NC_031940(20)	11	0.8695	0.5588
ST64	AS2	8	22.5	Questionable(70)	protease,integrase,head,lysis,terminase,tail	79081-101675	0	31	23	8	100	0	Yes	13	PHAGE_Entero_phi80_NC_021190(5)	5	0.1612	0.5097
	AS2	18	39.1	Intact(100)	tail,capsid,portal,terminase,lysis,integrase	121909-161102	0	33	25	8	100	0	Yes	13	PHAGE_Cronob_phiES15_NC_018454(11)	11	0.3333	0.5144
	AS2	24	4.7	Incomplete(30)	integrase,tail	2386-7123	0	6	6	0	100	0	Yes	4	PHAGE_Entero_cdtI_NC_009514(3)	3	0.5	0.478
ST64	AS4	9	22.5	Questionable(70)	tail,terminase,lysis,head,integrase,protease	1-22586	0	30	24	6	100	0	Yes	14	PHAGE_Entero_phi80_NC_021190(5)	5	0.1666	0.5098
	AS4	19	23.9	Questionable(90)	integrase,lysis,terminase,portal,capsid,tail	98469-122463	0	36	25	11	100	0	Yes	13	PHAGE_Cronob_phiES15_NC_018454(11)	11	0.3055	0.4823
	AS4	36	4.1	Incomplete(30)	integrase,tail	2917-7084	0	6	6	0	100	0	No	4	PHAGE_Entero_cdtI_NC_009514(3)	3	0.5	0.4897
ST64	AS13	6	22.5	Questionable(70)	tail,terminase,lysis,head,integrase,protease	123-22717	0	30	24	6	100	0	Yes	14	PHAGE_Entero_phi80_NC_021190(5)	5	0.1666	0.5097
	AS13	11	39.1	Intact(100)	tail,capsid,portal,terminase,lysis,integrase	137283-176476	0	35	25	10	100	0	Yes	13	PHAGE_Cronob_phiES15_NC_018454(11)	11	0.3142	0.5144
	AS13	33	4.7	Incomplete(30)	tail,integrase	213-4950	0	7	7	0	100	0	Yes	4	PHAGE_Entero_cdtI_NC_009514(3)	3	0.4285	0.478
ST64	AS15	14	39.1	Intact(100)	tail,capsid,portal,terminase,lysis,integrase	137362-176555	0	35	25	10	100	0	Yes	13	PHAGE_Cronob_phiES15_NC_018454(11)	11	0.3142	0.5144
	AS15	31	22.5	Questionable(70)	protease,integrase,head,lysis,terminase,tail	79081-101675	0	31	23	8	100	0	Yes	13	PHAGE_Entero_phi80_NC_021190(5)	5	0.1612	0.5097
	AS15	37	4.7	Incomplete(30)	tail,integrase	81-4818	0	7	7	0	100	0	Yes	4	PHAGE_Entero_cdtI_NC_009514(3)	3	0.4285	0.478
ST643	Jor100	16	29.3	Intact(120)	tail,terminase,capsid,portal,integrase	18380-47719	0	36	30	6	100	0	Yes	11	PHAGE_Haemop_HP1_NC_001697(17)	16	0.4722	0.5415
	Jor100	20	16.3	Incomplete(30)	integrase,tail	27120-43449	0	15	13	2	100	0	Yes	2	PHAGE_Cronob_ENT47670_NC_019927(12)	12	0.8	0.4904
	Jor100	60	10.4	Questionable(75)	integrase,head	2558-13030	0	12	8	4	100	0	Yes	2	PHAGE_Entero_P4_NC_001609(7)	7	0.5833	0.4957
ST643	Jor103	23	16.3	Incomplete(30)	integrase,tail	27120-43449	0	16	14	2	100	0	Yes	3	PHAGE_Cronob_ENT47670_NC_019927(12)	12	0.75	0.4904
	Jor103	47	10.4	Questionable(75)	integrase,head	43940-54412	0	11	8	3	100	0	Yes	2	PHAGE_Entero_P4_NC_001609(7)	7	0.6363	0.4957
	Jor103	53	29.3	Intact(120)	tail,terminase,capsid,portal,integrase	23371-52710	0	36	30	6	100	0	Yes	11	PHAGE_Haemop_HP1_NC_001697(17)	16	0.4722	0.5415
ST226	Jor22	18	55	Intact(150)	tail,head,plate,lysin,integrase	43992-99045	0	88	61	27	100	0	Yes	29	PHAGE_Cronob_ENT47670_NC_019927(25)	25	0.284	0.509
	Jor22	41	51.2	Questionable(80)	terminase,tail,integrase,recombinase	219-51463	1	87	58	29	100	0	Yes	8	PHAGE_Salmon_SSU5_NC_018843(53)	51	0.6091	0.4772
ST8	Jor44	1	42.9	Intact(150)	tail,plate,head,capsid,portal,terminase,integrase	346059-388965	0	51	41	10	100	0	Yes	20	PHAGE_Salmon_118970_sal3_NC_031940(18)	13	0.3529	0.5312
	Jor44	10	48.3	Intact(100)	integrase,lysis,terminase,portal,tail	299-48671	0	69	54	15	100	0	Yes	30	PHAGE_Cronob_ENT47670_NC_019927(18)	18	0.2608	0.5028
	Jor44	17	105.9	Intact(150)	tail,lysin,transposase,integrase,recombinase,terminase,capsid	1-105980	1	139	112	27	100	0	Yes	13	PHAGE_Salmon_SSU5_NC_018843(96)	99	0.6906	0.5055
	Jor44	23	54.1	Intact(150)	head,integrase,lysin,terminase,portal,tail	27974-82130	0	69	52	17	100	0	Yes	22	PHAGE_Cronob_ENT39118_NC_019934(15)	11	0.2173	0.5254
ST643	Jor93	1	16.3	Incomplete(30)	tail,integrase	200958-217287	0	12	9	3	100	0	Yes	2	PHAGE_Cronob_ENT47670_NC_019927(8)	8	0.6666	0.4905
	Jor93	6	10.4	Questionable(75)	head,integrase	102223-112695	0	11	8	3	100	0	Yes	2	PHAGE_Entero_P4_NC_001609(7)	7	0.6363	0.4957
	Jor93	22	31.1	Intact(130)	integrase,portal,terminase,capsid,tail	19858-51006	0	36	30	6	10	0	Yes	10	PHAGE_Haemop_HP1_NC_001697(17)	16	0.4722	0.534
ST4	Jor96	6	30.9	Intact(120)	integrase,portal,terminase,capsid,tail	23575-54549	0	39	31	8	100	0	Yes	12	PHAGE_Haemop_HP1_NC_001697(17)	16	0.4358	0.5376
	Jor96	7	47.8	Intact(120)	tail,capsid,portal,lysin,integrase	126266-174085	3	62	50	12	100	0	Yes	21	PHAGE_Cronob_phiES15_NC_018454(24)	25	0.387	0.5079
	Jor96	7	31.1	Intact(150)	transposase,head,portal,virion,protease,tail,plate	222230-253411	1	41	39	2	100	0	No	3	PHAGE_Escher_D108_NC_013594(38)	37	0.9268	0.5331
	Jor96	8	28.9	Incomplete(30)	plate,lysin	128008-156907	0	27	21	6	100	0	Yes	12	PHAGE_Salmon_SEN34_NC_028699(7)	6	0.2592	0.5351
	Jor96	13	37.2	Intact(150)	integrase,portal,terminase,capsid,tail,lysis,lysin,plate	211132-248425	0	32	28	4	100	0	Yes	2	PHAGE_Salmon_Fels_2_NC_010463(27)	27	0.8437	0.5255
	Jor96	23	20.6	Intact(140)	terminase,portal,capsid,head,tail,plate	322-20950	0	26	25	1	100	0	No	11	PHAGE_Salmon_118970_sal3_NC_031940(21)	12	0.8076	0.5521
	Jor96	32	36.1	Intact(120)	terminase,capsid,tail,lysin	132-36281	0	37	30	7	100	0	No	2	PHAGE_Salmon_SSU5_NC_018843(29)	29	0.7837	0.5206
	Jor96	36	48	Incomplete(40)	recombinase	43-48082	0	61	51	10	100	0	No	2	PHAGE_Salmon_SSU5_NC_018843(49)	50	0.8032	0.5165
ST643	Jor109	5	10.4	Questionable(75)	head,integrase	43813-54285	0	11	8	3	100	0	Yes	2	PHAGE_Entero_P4_NC_001609(7)	7	0.6363	0.4957
	Jor109	19	16.3	Incomplete(30)	tail,integrase	147327-163656	0	12	9	3	100	0	Yes	2	PHAGE_Cronob_ENT47670_NC_019927(8)	8	0.6666	0.4905
	Jor109	23	31.1	Intact(130)	integrase,portal,terminase,capsid,tail	19857-51005	0	36	30	6	100	0	Yes	10	PHAGE_Haemop_HP1_NC_001697(17)	16	0.4722	0.534
ST3	Jor146	2	43.4	Intact(150)	integrase,plate,lysin,lysis,terminase,portal,head,tail	171907-215342	1	50	42	8	100	0	Yes	19	PHAGE_Salmon_118970_sal3_NC_031940(13)	10	0.26	0.5402
	Jor146	6	19.8	Questionable(7)	tail,plate,lysin	205445-225324	1	27	23	4	100	0	No	10	PHAGE_Salmon_SEN34_NC_028699(13)	13	0.4814	0.5643
	Jor146	8	36.5	Intact(150)	head,tail,plate,capsid,portal,terminase,integrase	149287-185860	0	52	42	10	100	0	Yes	20	PHAGE_Salmon_118970_sal3_NC_031940(20)	14	0.3846	0.5266
ST3	Jor148	4	25.5	Intact(150)	head,tail,plate,capsid,portal,terminase	160621-186151	0	36	33	3	100	0	No	14	PHAGE_Salmon_118970_sal3_NC_031940(20)	12	0.5555	0.5438
	Jor148	4	19.2	Incomplete(20)	integrase	180276-199505	0	12	11	1	100	0	Yes	7	PHAGE_Cronob_phiES15_NC_018454(5)	5	0.4166	0.4564
	Jor148	10	49.1	Intact(100)	tail,head,terminase,lysis,integrase	28890-78025	0	76	57	19	100	0	Yes	28	PHAGE_Cronob_ENT47670_NC_019927(25)	25	0.3289	0.5074
	Jor148	40	31.3	Intact(150)	integrase,portal,terminase,capsid,tail,lysis,lysin,plate	13118-44504	0	41	37	4	100	0	Yes	3	PHAGE_Salmon_Fels_2_NC_010463(35)	35	0.8536	0.5329
	Jor148	56	94	Intact(150)	recombinase,integrase,tail,transposase,lysin,capsid,terminase	12361-106435	1	120	100	20	100	0	Yes	13	PHAGE_Salmon_SSU5_NC_018843(86)	86	0.7166	0.5147
	Jor148	63	40.8	Intact(150)	tail,head,portal,terminase,lysin,integrase	276-41161	0	37	31	6	100	0	Yes	15	PHAGE_Salmon_118970_sal3_NC_031940(10)	9	0.2702	0.5256
ST8	Jor151	3	18.1	Incomplete(20)	integrase	108155-126281	0	22	18	4	100	0	Yes	11	PHAGE_Cronob_phiES15_NC_018454(8)	8	0.3636	0.4887
	Jor151	3	19.2	Intact(140)	terminase,portal,capsid,head,tail,plate	125413-144670	0	23	22	1	100	0	No	10	PHAGE_Salmon_118970_sal3_NC_031940(18)	10	0.7826	0.5585
	Jor151	5	48.3	Intact(100)	tail,portal,terminase,lysis,integrase	52209-100598	0	77	55	22	100	0	Yes	31	PHAGE_Cronob_ENT47670_NC_019927(18)	18	0.2337	0.5028
	Jor151	10	54.1	Intact(150)	tail,portal,head,terminase,lysis,lysin,integrase	43886-98042	0	67	50	17	100	0	Yes	21	PHAGE_Cronob_ENT39118_NC_019934(13)	10	0.194	0.5254
	Jor151	26	104.7	Intact(150)	recombinase,integrase,tail,transposase,lysin,capsid,terminase	1249-105979	1	141	114	27	100	0	Yes	15	PHAGE_Salmon_SSU5_NC_018843(98)	99	0.695	0.5052
ST226	Jor20	13	50.4	Intact(150)	integrase,head,lysin,terminase,tail,plate	1-50447	0	80	64	16	100	0	Yes	31	PHAGE_Cronob_ENT47670_NC_019927(25)	25	0.3125	0.5048
	Jor20	27	51.5	Questionable(70)	recombinase,integrase,tail	3-51587	1	87	57	30	100	0	Yes	8	PHAGE_Salmon_SSU5_NC_018843(52)	50	0.5977	0.4772
ST4	Jor154	9	48.9	Intact(110)	integrase,lysin,terminase,head,tail,flippase	35-48981	0	78	57	21	100	0	No	24	PHAGE_Cronob_ENT47670_NC_019927(32)	32	0.4102	0.5072
	Jor154	26	17.7	Incomplete(40)	integrase,capsid,terminase	76666-94435	0	9	7	2	100	0	Yes	1	PHAGE_Salmon_RE_2010_NC_019488(7)	7	0.7777	0.5641
ST21	Jor183	29	8	Incomplete(10)	NA	16410-24434	2	8	6	2	100	0	No	5	PHAGE_Sphing_PAU_NC_019521(2)	2	0.25	0.5383
	Jor183	53	8.9	Incomplete(20)	plate	3534-12504	0	9	6	3	100	0	No	3	PHAGE_Entero_phi92_NC_023693(3)	4	0.3333	0.4422
	Jor183	58	5.8	Incomplete(20)	head	39963-45764	0	7	7	0	100	0	No	2	PHAGE_Entero_P4_NC_001609(6)	6	0.8571	0.5764
ST64	Jor172	1	43.4	Intact(150)	integrase,plate,lysin,head,tail	635141-678540	0	45	38	7	100	0	Yes	18	PHAGE_Cronob_ENT39118_NC_019934(11)	12	0.2444	0.5076
	Jor172	3	35.1	Intact(150)	integrase,lysis,terminase,portal,capsid,head,tail,plate	288168-323294	0	50	38	12	100	0	Yes	19	PHAGE_Salmon_118970_sal3_NC_031940(17)	11	0.34	0.5112
ST1	Jor173	1	43.7	Intact(120)	head,tail,plate,terminase,lysis,integrase	327710-371506	0	37	29	8	100	0	Yes	18	PHAGE_Salmon_118970_sal3_NC_031940(10)	9	0.2702	0.5198
	Jor173	7	12.2	Incomplete(30)	integrase,head	43911-56162	0	11	7	4	100	0	Yes	2	PHAGE_Entero_P4_NC_001609(6)	6	0.5454	0.4696
	Jor173	18	11.1	Incomplete(30)	head,terminase	1-11187	0	17	12	5	100	0	No	8	PHAGE_Cronob_ENT47670_NC_019927(5)	5	0.2941	0.5361
	Jor173	22	24.4	Incomplete(60)	head,tail,flippase,integrase	2-24476	0	12	11	1	100	0	Yes	10	PHAGE_Salmon_SPN9CC_NC_017985(4)	2	0.3333	0.4195
ST1, CC1	Jor175	4	19.9	Incomplete(30)	integrase,lysis	208988-228968	0	21	19	2	100	0	Yes	11	PHAGE_Cronob_phiES15_NC_018454(9)	9	0.4285	0.4666
	Jor175	12	11.9	Incomplete(30)	head,integrase	228051-239952	0	10	7	3	100	0	Yes	2	PHAGE_Entero_P4_NC_001609(6)	6	0.6	0.4708
	Jor175	31	14.1	Incomplete(60)	integrase,flippase,tail,head	7308-21504	0	12	11	1	100	0	No	10	PHAGE_Salmon_g341c_NC_013059(3)	2	0.25	0.4579
	Jor175	35	8.5	Incomplete(30)	head,terminase	2975-11507	0	16	12	4	100	0	No	8	PHAGE_Cronob_ENT47670_NC_019927(5)	5	0.3125	0.5248
ST4	Jor178	4	115	Intact(150)	recombinase,integrase,protease,lysin,tail,capsid,terminase	312-115321	0	123	85	38	100	0	Yes	8	PHAGE_Salmon_SSU5_NC_018843(77)	78	0.626	0.5
	Jor178	5	24.3	Intact(150)	plate,tail,lysin,lysis,terminase,capsid,portal,integrase	1060-25440	0	32	28	4	100	0	Yes	2	PHAGE_Salmon_Fels_2_NC_010463(27)	27	0.8437	0.4935
	Jor178	6	20.4	Incomplete(30)	lysin,plate	554-20955	0	27	21	6	100	0	Yes	12	PHAGE_Salmon_SEN34_NC_028699(7)	6	0.2592	0.5148
	Jor178	8	30.9	Intact(120)	integrase,portal,terminase,capsid,tail	421559-452533	0	32	30	2	100	0	Yes	11	PHAGE_Haemop_HP1_NC_001697(17)	16	0.5312	0.5376
	Jor178	15	30.6	Intact(150)	plate,tail,head,protease,virion,portal,transposase	628-31294	1	41	38	3	100	0	No	3	PHAGE_Escher_D108_NC_013594(37)	36	0.9024	0.5339
	Jor178	15	48.1	Intact(120)	integrase,lysin,portal,capsid,tail	79350-127546	3	62	49	13	100	0	Yes	21	PHAGE_Cronob_phiES15_NC_018454(23)	24	0.3709	0.5069
	Jor178	29	12.6	Questionable(90)	tail,head,capsid,portal,terminase	664-13310	0	18	16	2	100	0	No	8	PHAGE_Salmon_118970_sal3_NC_031940(11)	7	0.6111	0.5567
ST223	Jor204	6	34.6	Intact(150)	capsid,terminase,lysis,tail,plate,head	91909-126593	0	39	34	5	100	0	Yes	9	PHAGE_Entero_186_NC_001317(19)	16	0.4871	0.552
	Jor204	8	20.4	Incomplete(20)	integrase	721766-742208	0	22	19	3	100	0	Yes	9	PHAGE_Cronob_phiES15_NC_018454(10)	10	0.4545	0.4547
	Jor204	8	18.8	Intact(100)	terminase,portal,capsid,head,tail,plate	741340-760173	0	21	20	1	100	0	No	6	PHAGE_Salmon_118970_sal3_NC_031940(17)	10	0.8095	0.5606
	Jor204	11	10.8	Incomplete(30)	integrase,head	258303-269164	0	10	8	2	100	0	Yes	3	PHAGE_Entero_P4_NC_001609(6)	6	0.6	0.4878
ST93	KW1	2	36.6	Intact(150)	tail,head,portal,terminase,lysis,lysin,integrase	47631-84325	0	45	39	6	100	0	Yes	17	PHAGE_Cronob_ENT39118_NC_019934(12)	12	0.2666	0.5382
	KW1	2	25.3	Questionable(70)	tail,plate,lysin,integrase	239588-264962	0	33	25	8	100	0	Yes	12	PHAGE_Salmon_SEN34_NC_028699(13)	13	0.3939	0.523
	KW1	5	42.5	Intact(140)	integrase,tail,capsid,terminase,lysis,lysin	2087895-2130412	0	58	44	14	100	0	Yes	14	PHAGE_Cronob_phiES15_NC_018454(31)	31	0.5344	0.5259
	KW1	11	109.4	Intact(150)	recombinase,integrase,protease,lysin,tail,capsid,terminase	1-109447	1	125	101	24	100	0	Yes	9	PHAGE_Salmon_SSU5_NC_018843(92)	92	0.736	0.5034
ST40	KW3	3	7.5	Incomplete(10)	NA	89085-96630	2	9	6	3	100	0	No	5	PHAGE_Sphing_PAU_NC_019521(2)	2	0.2222	0.5407
	KW3	15	8.6	Incomplete(10)	NA	151873-160530	0	8	6	2	100	0	No	5	PHAGE_Bacill_G_NC_023719(2)	2	0.25	0.5931
	KW3	17	9.6	Incomplete(40)	tail,head	41441-51139	0	10	7	3	100	0	No	5	PHAGE_Cronob_ENT39118_NC_019934(3)	3	0.3	0.54
	KW3	20	8	Incomplete(20)	tail	36446-44498	0	9	6	3	100	0	No	2	PHAGE_Cronob_ENT47670_NC_019927(5)	5	0.5555	0.4623
ST73	KW4	1	41.2	Intact(150)	integrase,tail,plate,head,portal,terminase,lysin	706203-747445	0	55	46	9	100	0	Yes	9	PHAGE_Shigel_SfII_NC_021857(36)	34	0.6545	0.4978
	KW4	2	28.1	Questionable(90)	recombinase,capsid,integrase,lysin,tail,plate	458151-486312	0	39	25	14	100	0	Yes	12	PHAGE_Salmon_SEN34_NC_028699(13)	13	0.3333	0.5489
	KW4	3	30.8	Intact(130)	terminase,head,tail	102-30910	0	42	30	12	100	0	No	13	PHAGE_Cronob_ENT47670_NC_019927(14)	14	0.3333	0.5155
	KW4	3	22.3	Questionable(70)	integrase,terminase,plate,tail	616522-638897	0	17	13	4	100	0	Yes	8	PHAGE_Salmon_118970_sal3_NC_031940(9)	6	0.5294	0.5154
	KW4	3	58.2	Questionable(83)	integrase,head,lysis	707754-766048	0	55	44	11	100	0	Yes	13	PHAGE_Entero_Tyrion_NC_031077(29)	29	0.5272	0.5509
	KW4	12	9.3	Incomplete(20)	head	01-09345	0	19	16	3	100	0	No	12	PHAGE_Shigel_Sf6_NC_005344(5)	5	0.2631	0.5164
	KW4	13	11.5	Incomplete(10)	NA	1-11517	0	25	17	8	100	0	No	13	PHAGE_Entero_HK140_NC_019710(4)	4	0.16	0.4895
	KW4	14	27.1	Intact(120)	tail,plate,head,portal,terminase,lysis	286-27447	0	40	35	5	100	0	No	10	PHAGE_Salmon_SEN34_NC_028699(24)	24	0.6	0.5212
ST143, CC143	KW9	1	43.4	Intact(130)	integrase,portal,terminase,capsid,tail	454322-497752	0	36	30	6	100	0	Yes	10	PHAGE_Haemop_HP1_NC_001697(18)	17	0.5	0.5562
	KW9	2	47	Intact(140)	tail,portal,terminase,lysis,integrase	797166-844262	0	73	55	18	100	0	Yes	30	PHAGE_Cronob_ENT47670_NC_019927(14)	14	0.1917	0.5054
	KW9	5	72.2	Intact(130)	tail,capsid,terminase,recombinase,integrase	3250-75540	0	84	70	14	100	0	Yes	3	PHAGE_Salmon_SSU5_NC_018843(67)	68	0.7976	0.5184
	KW9	12	11.5	Incomplete(20)	lysin	9380-20915	0	17	13	4	100	0	No	3	PHAGE_Salmon_SSU5_NC_018843(11)	11	0.647	0.4814
	KW9	15	15	Incomplete(40)	integrase,capsid	4-15032	0	9	6	3	100	0	Yes	6	PHAGE_Xantho_Xp10_NC_004902(3)	1	0.3333	0.5051
	KW9	16	20.7	Incomplete(20)	integrase	2-20712	0	10	10	0	100	0	Yes	6	PHAGE_Cronob_phiES15_NC_018454(5)	5	0.5	0.5678
	KW9	22	26.9	Incomplete(60)	tail,capsid,portal,lysin	57-27001	3	43	30	13	100	0	No	20	PHAGE_Cronob_phiES15_NC_018454(7)	8	0.1627	0.4885
	KW9	25	17.7	Questionable(70)	tail,capsid,terminase,lysis,lysin	57-17847	2	29	27	2	100	0	No	5	PHAGE_Cronob_phiES15_NC_018454(23)	23	0.7931	0.5439
ST642	KW11	2	24.6	Incomplete(40)	tail,terminase,integrase	578732-603344	0	27	17	10	100	0	Yes	9	PHAGE_Salmon_Fels_1_NC_010391(6)	6	0.2222	0.5501
	KW11	9	27.5	Intact(150)	tail,plate,lysin,lysis,terminase,capsid,portal	44064-71592	0	36	28	8	100	0	No	2	PHAGE_Salmon_Fels_2_NC_010463(27)	27	0.75	0.5394
	KW11	17	8	Incomplete(40)	tail,integrase	03-08049	1	8	6	2	100	0	No	5	PHAGE_Entero_Sf101_NC_027398(2)	2	0.25	0.41
ST4	LR631	2	48.5	Intact(114)	integrase,transposase,head,tail	25412-73974	2	73	57	16	100	0	Yes	21	PHAGE_Cronob_ENT47670_NC_019927(35)	35	0.4794	0.5135
	LR631	2	25.5	Intact(130)	head,tail,plate,capsid,portal,terminase	1405725-1431239	0	34	29	5	100	0	No	12	PHAGE_Salmon_118970_sal3_NC_031940(18)	12	0.5294	0.5358
	LR631	2	11.8	Incomplete(20)	integrase	1432111-1443972	0	12	11	1	100	0	Yes	7	PHAGE_Cronob_phiES15_NC_018454(5)	5	0.4166	0.453
	LR631	4	36.1	Intact(150)	tail,head,portal,terminase,lysin,integrase	56440-92606	0	42	39	3	100	0	Yes	19	PHAGE_Cronob_ENT39118_NC_019934(11)	11	0.2619	0.5475
	LR631	15	13	Incomplete(10)	NA	196-13195	0	24	24	0	100	0	No	2	PHAGE_Entero_lambda_NC_001416(23)	23	0.9583	0.4619
ST13	KW13	2	18.5	Incomplete(30)	integrase,lysin	93069-111583	0	29	24	5	100	0	Yes	10	PHAGE_Cronob_phiES15_NC_018454(15)	15	0.5172	0.4999
	KW13	5	9.7	Incomplete(60)	lysis,terminase,tail	571247-580978	0	21	12	9	100	0	No	7	PHAGE_Cronob_phiES15_NC_018454(6)	6	0.2857	0.4956
	KW13	9	47.4	Intact(100)	tail,portal,terminase,lysis,integrase	200326-247757	0	62	52	10	100	0	Yes	27	PHAGE_Cronob_ENT47670_NC_019927(18)	18	0.2903	0.5031
ST156	KW18	1	34.2	intact(150)	integrase,portal,terminase,capsid,tail,lysis,lysin,plate	567325-601540	0	40	35	5	100	0	Yes	3	PHAGE_Salmon_Fels_2_NC_010463(33)	33	0.825	0.528
	KW18	7	26.7	Incomplete(60)	tail,head,terminase	541195-567956	0	39	28	11	100	0	no	11	PHAGE_Cronob_ENT47670_NC_019927(17)	17	0.4358	0.5198
	KW18	8	25.5	Intact(150)	tail,head,portal,terminase	172871-198385	0	37	30	7	100	0	No	13	PHAGE_Entero_mEp235_NC_019708(15)	15	0.4054	0.5449
ST13, CC13	LR607	6	9.7	Incomplete(60)	lysis,terminase,tail	3085-12879	0	16	12	4	100	0	No	7	PHAGE_Cronob_phiES15_NC_018454(6)	6	0.375	0.4959
	LR607	17	8.4	Incomplete(20)	lysin	503-8937	0	17	13	4	100	0	No	3	PHAGE_Cronob_phiES15_NC_018454(11)	11	0.647	0.531
	LR607	32	7.6	Incomplete(20)	integrase	411-8096	0	11	10	1	100	0	Yes	7	PHAGE_Cronob_phiES15_NC_018454(4)	4	0.3636	0.4917
	LR607	37	41.5	Intact(120)	lysis,tail,head,portal,terminase,lysin	20545-62142	0	59	47	12	100	0	No	19	PHAGE_Cronob_ENT47670_NC_019927(21)	21	0.3559	0.504
ST1, CC1	LR626	1	19.6	Incomplete(40)	integrase,lysin,terminase	286940-306585	0	17	13	4	100	0	Yes	10	PHAGE_Salmon_SEN22_NC_028696(4)	4	0.2352	0.5598
	LR626	5	51.3	Intact(140)	integrase,terminase,head,tail	738163-789554	0	77	61	16	100	0	Yes	33	PHAGE_Cronob_ENT47670_NC_019927(20)	20	0.2597	0.5158
	LR626	5	19.9	Incomplete(30)	integrase,lysis	940128-960107	0	21	19	2	100	0	Yes	11	PHAGE_Cronob_phiES15_NC_018454(9)	9	0.4285	0.4666
	LR626	5	43.6	Intact(130)	integrase,terminase,head,protease,capsid,tail,flippase,lysin,lysis	1048069-1091712	0	55	42	13	100	0	Yes	13	PHAGE_Salmon_SPN1S_NC_016761(26)	26	0.4727	0.5385
	LR626	5	10.8	Incomplete(50)	virion,transposase	1157064-1167941	0	11	9	2	100	0	No	6	PHAGE_Acinet_vB_AbaM_ME3_NC_041884(3)	4	0.2727	0.4959
	LR626	6	108.5	Intact(150)	recombinase,integrase,protease,lysin,tail,capsid,terminase	177-108680	1	123	99	24	100	0	Yes	8	PHAGE_Salmon_SSU5_NC_018843(90)	91	0.7317	0.5028
ST1	LR627	8	10.8	Incomplete(50)	virion,transposase	52393-63270	0	11	9	2	100	0	No	6	PHAGE_Acinet_vB_AbaM_ME3_NC_041884(3)	4	0.2727	0.496
	LR627	10	36.5	Intact(120)	tail,plate,terminase,lysis,integrase	93042-129586	0	38	30	8	100	0	Yes	17	PHAGE_Salmon_118970_sal3_NC_031940(11)	9	0.2894	0.5106
	LR627	59	18	Incomplete(40)	tail,flippase,integrase	267-18363	0	10	9	1	100	0	Yes	9	PHAGE_Salmon_SPN9CC_NC_017985(3)	1	0.3	0.4103
ST4	LR632	36	36.6	Intact(150)	integrase,lysin,lysis,terminase,portal,head,tail	47484-84101	0	46	41	5	100	0	Yes	18	PHAGE_Cronob_ENT39118_NC_019934(12)	12	0.2608	0.5461
	LR632	36	26.8	Incomplete(20)	integrase	399706-426531	0	11	10	1	100	0	Yes	7	PHAGE_Cronob_phiES15_NC_018454(4)	4	0.3636	0.5262
	LR632	38	19.2	Intact(110)	tail,plate,head,capsid,portal,terminase	122827-142044	0	22	21	1	100	0	No	7	PHAGE_Salmon_118970_sal3_NC_031940(19)	11	0.8636	0.5593
	LR632	9	25.4	Intact(150)	plate,tail,lysin,lysis,terminase,capsid,portal,integrase	1093-26497	0	30	28	2	100	0	Yes	3	PHAGE_Salmon_Fels_2_NC_010463(26)	26	0.8666	0.5267
	LR632	14	36	Questionable(87)	tail	620-36676	0	47	39	8	100	0	No	9	PHAGE_Burkho_BcepMu_NC_005882(31)	31	0.6595	0.5627
	LR632	17	43.1	Intact(150)	tail,plate,lysin,lysis,terminase,capsid,portal,integrase	31401-74597	0	37	35	2	100	0	Yes	3	PHAGE_Salmon_Fels_2_NC_010463(33)	33	0.8918	0.56
	LR632	22	8.9	Incomplete(40)	transposase,virion	543-9532	0	11	6	5	100	0	No	6	PHAGE_Prochl_P_SSM3_NC_021559(1)	1	0.0909	0.6017
ST148	LR634	29	37.2	Intact(150)	integrase,capsid,terminase,head,tail,lysis,plate	134171-171371	0	47	40	7	100	0	Yes	5	PHAGE_Salmon_RE_2010_NC_019488(35)	35	0.7446	0.5103
	LR634	3	42.3	Intact(150)	tail,head,portal,terminase,lysis,lysin,integrase	7-42331	0	48	39	9	100	0	Yes	21	PHAGE_Salmon_118970_sal3_NC_031940(11)	9	0.2291	0.557
	LR634	4	40.2	Intact(120)	integrase,head,lysis,terminase,portal,capsid,tail	54802-95061	0	62	45	17	100	0	Yes	26	PHAGE_Shigel_Sf6_NC_005344(11)	10	0.1774	0.5115
	LR635	4	40.3	Intact(120)	tail,head,capsid,portal,terminase,lysis,integrase	524389-564691	0	61	45	16	100	0	Yes	26	PHAGE_Shigel_Sf6_NC_005344(11)	10	0.1803	0.5113
ST148	LR635	4	50.2	Intact(150)	tail,head,portal,terminase,lysis,lysin,integrase	732626-782828	0	52	44	8	100	0	Yes	23	PHAGE_Cronob_ENT39118_NC_019934(13)	13	0.25	0.5264
	LR635	7	41.8	Intact(150)	tail,plate,lysis,head,terminase,capsid,integrase	43949-85842	0	41	38	3	100	0	Yes	4	PHAGE_Salmon_RE_2010_NC_019488(35)	35	0.8536	0.4864
	LR636	2	40.2	Questionable(70)	integrase,head,tail	54815-95074	0	55	42	13	100	0	Yes	23	PHAGE_Shigel_Sf6_NC_005344(11)	11	0.2	0.5115
ST148	LR636	3	41.9	Intact(150)	integrase,capsid,terminase,head,tail,lysis,plate	571519-613423	0	43	38	5	100	0	Yes	4	PHAGE_Salmon_RE_2010_NC_019488(35)	35	0.8139	0.4863
	LR636	11	43	Intact(150)	integrase,lysin,lysis,terminase,portal,head,tail	32789-75882	0	46	40	6	100	0	Yes	21	PHAGE_Salmon_118970_sal3_NC_031940(11)	9	0.2391	0.5573
ST148	LR637	3	42.2	Intact(150)	integrase,lysin,lysis,terminase,portal,head,tail	127090-169337	0	53	46	7	100	0	Yes	23	PHAGE_Cronob_ENT39118_NC_019934(13)	13	0.2452	0.5332
	LR637	3	40.2	Questionable(80)	integrase,head,lysis,tail	344871-385130	0	62	45	17	100	0	Yes	25	PHAGE_Shigel_Sf6_NC_005344(11)	11	0.1774	0.5115
	LR637	4	41.9	Intact(150)	integrase,capsid,terminase,head,tail,lysis,plate	571737-613641	0	43	38	5	100	0	Yes	4	PHAGE_Salmon_RE_2010_NC_019488(35)	35	0.8139	0.4863
ST1, CC1	LR639	2	61.6	Intact(150)	capsid,integrase,tail,portal,terminase,head	3322-64947	0	74	57	17	100	0	Yes	30	PHAGE_Entero_ES18_NC_006949(16)	14	0.2162	0.5177
	LR639	13	57.6	Intact(120)	tail,terminase,capsid,portal,integrase	128-57784	0	32	29	3	100	0	Yes	11	PHAGE_Haemop_HP2_NC_003315(17)	17	0.5312	0.5532
	LR639	14	19.9	Incomplete(30)	integrase,lysis	40001-59980	0	21	19	2	100	0	yes	11	PHAGE_Cronob_phiES15_NC_018454(9)	9	0.4285	0.4666
	LR639	14	10.8	Incomplete(50)	virion,transposase	214004-224881	0	11	9	2	100	0	No	6	PHAGE_Acinet_vB_AbaM_ME3_NC_041884(3)	4	0.2727	0.496
	LR639	17	12.1	Incomplete(30)	head,integrase	78794-90920	0	10	8	2	100	0	Yes	3	PHAGE_Entero_P4_NC_001609(6)	6	0.6	0.4685
ST21, CC21	LR641	1	59.6	Questionable(90)	lysis,flippase,capsid,head,integrase	284489-344103	0	63	45	18	100	0	Yes	17	PHAGE_Entero_Tyrion_NC_031077(26)	26	0.4126	0.5508
	LR641	2	12.4	Incomplete(30)	integrase,head	43728-56185	0	11	7	4	100	0	Yes	2	PHAGE_Entero_P4_NC_001609(6)	6	0.5454	0.4411
	LR641	11	47	Intact(150)	tail,head,portal,terminase,lysin,plate,integrase	163214-210265	2	62	47	15	100	0	Yes	24	PHAGE_Salmon_118970_sal3_NC_031940(13)	9	0.2096	0.5354
	LR641	17	111.8	Intact(150)	transposase,recombinase,integrase,tail,lysin,capsid,terminase	1-111837	1	142	110	32	100	0	Yes	12	PHAGE_Salmon_SSU5_NC_018843(96)	99	0.676	0.5022
ST1, CC1	LR711	1	12.1	Incomplete(30)	head,integrase	478162-490288	0	9	7	2	100	0	Yes	2	PHAGE_Entero_P4_NC_001609(6)	6	0.6666	0.4685
	LR711	7	57.6	Intact(120)	tail,terminase,capsid,portal,integrase	142217-199873	0	37	29	8	100	0	Yes	11	PHAGE_Haemop_HP2_NC_003315(17)	17	0.4594	0.5532
	LR711	14	19.9	Incomplete(120)	integrase,lysis	40110-60089	0	21	19	2	100	0	Yes	11	PHAGE_Cronob_phiES15_NC_018454(9)	9	0.4285	0.4666
	LR711	16	46.8	Intact(150)	integrase,head,terminase,portal,tail	23518-70391	0	70	55	15	100	0	Yes	28	PHAGE_Entero_ES18_NC_006949(15)	14	0.2142	0.5089
ST21, CC21	LR702	4	25.4	Intact(150)	plate,tail,lysin,lysis,terminase,capsid,portal,integrase	1060-26469	0	31	28	3	100	0	Yes	3	PHAGE_Salmon_Fels_2_NC_010463(26)	26	0.8387	0.5272
	LR702	5	39.5	Incomplete(60)	integrase,head,lysis	70848-110348	0	46	33	13	100	0	Yes	9	PHAGE_Entero_Tyrion_NC_031077(25)	25	0.5434	0.5657
	LR702	17	18.4	Incomplete(60)	virion,transposase,integrase	39355-57800	0	14	7	7	100	0	Yes	6	PHAGE_Shigel_Sf6_NC_005344(2)	2	0.1428	0.5268
	LR702	36	36.5	Intact(150)	tail,head,portal,terminase,lysin,plate,integrase	1586-38161	2	47	39	8	100	0	Yes	19	PHAGE_Entero_mEp235_NC_019708(15)	15	0.3191	0.5324
ST22	LR703	5	29.1	Intact(120)	integrase,portal,terminase,capsid,tail	171904-201059	0	32	29	3	100	0	Yes	10	PHAGE_Haemop_HP2_NC_003315(16)	16	0.5	0.549
	LR703	16	26.1	Intact(150)	head,tail,plate,capsid,portal,terminase,lysis	123538-149725	0	39	32	7	100	0	No	14	PHAGE_Salmon_118970_sal3_NC_031940(21)	12	0.5384	0.5398
	LR703	16	23.3	Incomplete(20)	integrase	137946-161291	0	12	11	1	100	0	Yes	7	PHAGE_Cronob_phiES15_NC_018454(5)	5	0.4166	0.4785
	LR703	23	41.3	Intact(150)	tail,head,portal,terminase,lysin,integrase	147131-188473	0	52	40	12	100	0	Yes	19	PHAGE_Salmon_118970_sal3_NC_031940(11)	11	0.2115	0.5328
ST73, CC73	LR643	1	20.5	Intact(150)	tail,plate,head,terminase,capsid	111515-132047	0	27	23	4	100	0	No	6	PHAGE_Escher_pro483_NC_028943(16)	16	0.5925	0.5876
	LR643	3	51.3	Intact(150)	integrase,tail,head,terminase,lysis	301789-353095	0	71	57	14	100	0	Yes	34	PHAGE_Cronob_ENT47670_NC_019927(20)	20	0.2816	0.5146
	LR643	11	40.6	Questionable(90)	tail,plate,lysin,integrase,capsid	78133-118818	0	30	24	6	100	0	yes	11	PHAGE_Salmon_SEN34_NC_028699(13)	13	0.4333	0.5367
	LR643	14	18.7	Intact(130)	tail,plate,head,capsid,portal,terminase	148129-166873	0	21	20	1	100	0	No	7	PHAGE_Salmon_118970_sal3_NC_031940(18)	11	0.8571	0.5618
	LR643	14	16.3	Incomplete(20)	lysis	169999-186308	0	24	19	5	100	0	No	9	PHAGE_Cronob_phiES15_NC_018454(11)	11	0.4583	0.4663
ST73, CC73	LR646	1	18.8	Intact(130)	terminase,portal,capsid,head,tail,plate	401008-419848	0	21	20	1	100	0	no	8	PHAGE_Salmon_118970_sal3_NC_031940(18)	10	0.8571	0.5616
	LR646	14	40.6	Questionable(90)	capsid,integrase,lysin,tail,plate	123019-163704	0	28	24	4	100	0	Yes	11	PHAGE_Salmon_SEN34_NC_028699(13)	13	0.4642	0.5367
	LR646	14	20.5	Intact(150)	tail,plate,head,terminase,capsid	353148-373680	0	25	23	2	100	0	No	6	PHAGE_Escher_pro483_NC_028943(16)	16	0.64	0.5876
	LR646	16	51.3	Intact(150)	integrase,tail,head,terminase,lysis	324786-376092	0	71	57	14	100	0	Yes	34	PHAGE_Cronob_ENT47670_NC_019927(20)	20	0.2816	0.5146
ST23	LR654	1	5.5	Incomplete(10)	NA	111474-117011	0	12	9	3	100	0	No	8	PHAGE_Escher_HK639_NC_016158(2)	2	0.1666	0.5358
	LR654	19	9.3	Incomplete(10)	NA	16616-25986	0	8	7	1	100	0	No	2	PHAGE_Entero_phi92_NC_023693(5)	6	0.625	0.4333
	LR654	36	8.6	Incomplete(10)	NA	60264-68921	0	8	6	2	100	0	No	5	PHAGE_Bacill_G_NC_023719(2)	2	0.25	0.5938
ST1	LR708	7	42.9	Intact(150)	head,tail,plate,capsid,portal,terminase,lysis,integrase	431862-474830	0	46	37	9	100	0	Yes	19	PHAGE_Salmon_118970_sal3_NC_031940(14)	9	0.3043	0.5164
	LR708	36	19.7	Incomplete(40)	tail	114429-134223	0	22	19	3	100	0	No	2	PHAGE_Cronob_ENT47670_NC_019927(18)	18	0.8181	0.5035
	LR708	10	12	Incomplete(20)	integrase	254380-266452	0	7	6	1	100	0	Yes	5	PHAGE_Salmon_118970_sal4_NC_030919(2)	2	0.2857	0.5582
	LR708	14	20.5	Incomplete(20)	integrase	203-20707	0	39	25	14	100	0	Yes	18	PHAGE_Cronob_ENT47670_NC_019927(6)	7	0.1538	0.5231
ST1, CC1	LR688	6	19.7	Incomplete(40)	tail	114560-134354	0	22	19	3	100	0	No	2	PHAGE_Cronob_ENT47670_NC_019927(18)	18	0.8181	0.5035
	LR688	7	40.6	Intact(150)	integrase,lysis,terminase,portal,capsid,head,tail,plate	40020-80707	0	47	36	11	100	0	Yes	18	PHAGE_Salmon_118970_sal3_NC_031940(14)	9	0.2978	0.5144
	LR688	8	20.5	Incomplete(20)	integrase	203-20707	0	39	25	14	100	0	Yes	18	PHAGE_Cronob_ENT47670_NC_019927(6)	7	0.1538	0.5231
	LR688	12	12	Incomplete(20)	integrase	184086-196158	0	7	6	1	100	0	Yes	5	PHAGE_Salmon_118970_sal4_NC_030919(2)	2	0.2857	0.5582
ST1, CC1	LR704	6	42.9	Intact(150)	head,tail,plate,capsid,portal,terminase,lysis,integrase	338974-381942	0	46	37	9	100	0	Yes	19	PHAGE_Salmon_118970_sal3_NC_031940(14)	9	0.3043	0.5164
	LR704	6	19.7	Incomplete(40)	tail	525856-545650	0	22	19	3	100	0	NO	2	PHAGE_Cronob_ENT47670_NC_019927(18)	18	0.8181	0.5035
	LR704	8	20.5	Incomplete(20)	integrase	203-20707	0	39	25	14	100	0	Yes	18	PHAGE_Cronob_ENT47670_NC_019927(6)	7	0.1538	0.5231
	LR704	15	12	Incomplete(20)	integrase	232580-244652	0	7	6	1	100	0	Yes	5	PHAGE_Salmon_118970_sal4_NC_030919(2)	2	0.2857	0.5582
ST4	LR705	11	15.7	Incomplete(50)	integrase,capsid	8232-23964	0	21	9	12	100	0	Yes	9	PHAGE_Xantho_Xp10_NC_004902(2)	1	0.0952	0.5077
	LR705	25	59	Intact(110)	tail,head,terminase,lysin,integrase,transposase	127149-186196	1	76	58	18	100	0	Yes	25	PHAGE_Cronob_ENT47670_NC_019927(30)	30	0.3947	51.35
	LR705	25	8.9	Incomplete(40)	transposase,virion	184694-193683	0	12	7	5	100	0	No	7	PHAGE_Entero_P1_NC_005856(2)	1	0.1666	0.6021
	LR705	44	20.9	Intact(150)	tail,plate,lysis,head,terminase,capsid	1768-22757	0	28	25	3	100	0	No	2	PHAGE_Salmon_RE_2010_NC_019488(24)	24	0.8571	0.5608
	LR705	51	101.6	Intact(150)	terminase,capsid,tail,lysin,integrase,recombinase	474-102137	1	132	100	32	100	0	Yes	9	PHAGE_Salmon_SSU5_NC_018843(92)	91	0.6969	0.511
ST1	LR707	26	20.7	Incomplete(30)	integrase	162914-183621	0	40	26	14	100	0	Yes	19	PHAGE_Cronob_ENT47670_NC_019927(6)	7	0.15	0.5239
	LR707	6	14.9	Incomplete(40)	tail	3-14951	0	17	15	2	100	0	No	2	PHAGE_Cronob_ENT47670_NC_019927(14)	14	0.8235	0.5225
	LR707	6	40.6	Intact(150)	integrase,lysis,terminase,portal,capsid,head,tail,plate	174147-214834	0	47	36	11	100	0	Yes	18	PHAGE_Salmon_118970_sal3_NC_031940(14)	9	0.2978	0.5144
	LR707	7	12.1	Incomplete(20)	integrase	254233-266333	0	8	7	1	100	0	Yes	6	PHAGE_Salmon_118970_sal4_NC_030919(2)	2	0.25	0.5586
6 matches found: atpD 5, glnS 3, gltB 3, gyrB 5, infB 5, pps 4	LR712	5	8.9	Incomplete(40)	transposase,virion	604-9593	0	13	7	6	100	0	No	7	PHAGE_Entero_P1_NC_005856(2)	1	0.1538	0.6021
	LR712	5	59	Intact(110)	transposase,integrase,lysin,terminase,head,tail	8080-67138	1	73	58	15	100	0	Yes	25	PHAGE_Cronob_ENT47670_NC_019927(30)	30	0.4109	0.5136
	LR712	35	97.7	Intact(140)	tail,lysin,integrase,recombinase,terminase,capsid	101-97830	1	131	99	32	100	0	Yes	9	PHAGE_Salmon_SSU5_NC_018843(91)	90	0.6946	0.5075
	LR712	67	21.8	Intact(150)	tail,plate,lysis,head,terminase,capsid	10139-31982	0	26	25	1	100	0	No	2	PHAGE_Salmon_RE_2010_NC_019488(24)	24	0.923	0.5609
	LR712	70	12.4	Incomplete(40)	integrase,capsid	2379-14787	0	18	8	10	100	0	No	8	PHAGE_Xantho_Xp10_NC_004902(2)	1	0.1111	0.5114
ST83, CC83	LR713	1	19.8	Questionable(70)	plate,lysin,tail	371272-391160	1	26	23	3	100	0	No	10	PHAGE_Salmon_SEN34_NC_028699(13)	13	0.5	0.5644
	LR713	2	41.5	Intact(150)	integrase,lysin,terminase,portal,head,tail	309810-351408	2	56	49	7	100	0	Yes	23	PHAGE_Cronob_ENT39118_NC_019934(12)	12	0.2142	0.5483
	LR713	4	60.7	Questionable(83)	lysis,head,integrase	50735-111445	0	54	44	10	100	0	Yes	15	PHAGE_Entero_Tyrion_NC_031077(29)	29	0.537	0.5609
	LR713	4	26.4	Intact(120)	tail,plate,head,capsid,portal,terminase,lysis	186509-212970	0	38	30	8	100	0	No	13	PHAGE_Salmon_118970_sal3_NC_031940(19)	11	0.5	0.5342
	LR713	4	7.3	Incomplete(20)	integrase	218140-225459	0	10	9	1	100	0	Yes	7	PHAGE_Cronob_phiES15_NC_018454(3)	3	0.3	0.5143
	LR713	4	50	Intact(150)	tail,head,terminase,lysis,integrase	379645-429743	0	71	53	18	100	0	Yes	27	PHAGE_Cronob_ENT47670_NC_019927(17)	17	0.2394	0.5178
ST1, CC1	LR714	2	12.1	Incomplete(30)	head,integrase	645154-657280	0	9	7	2	100	0	Yes	2	PHAGE_Entero_P4_NC_001609(6)	6	0.6666	0.4685
	LR714	3	36.9	Intact(150)	integrase,lysis,terminase,portal,capsid,head,tail	40110-77085	0	44	31	13	100	0	Yes	18	PHAGE_Cronob_phiES15_NC_018454(9)	9	0.2045	0.5083
	LR714	15	57.6	Intact(120)	integrase,portal,terminase,capsid,tail	2021-59677	0	33	30	3	100	0	Yes	11	PHAGE_Haemop_HP2_NC_003315(17)	17	0.5151	0.5532
	LR714	17	58.8	Intact(150)	capsid,integrase,tail,portal,terminase,head	22348-81214	0	77	58	19	100	0	Yes	32	PHAGE_Entero_ES18_NC_006949(15)	14	0.1948	0.5042
ST4, CC4	LR715	3	59	Intact(110)	tail,head,terminase,lysin,integrase,transposase	126117-185164	1	76	58	18	100	0	Yes	25	PHAGE_Cronob_ENT47670_NC_019927(30)	30	0.3947	0.5135
	LR715	3	8.9	Incomplete(40)	transposase,virion	183662-192651	0	12	7	5	100	0	No	7	PHAGE_Entero_P1_NC_005856(2)	1	0.1666	0.6021
	LR715	21	36.5	Incomplete(60)	integrase,capsid	78423-115020	0	20	9	111	100	0	Yes	9	PHAGE_Xantho_Xp10_NC_004902(2)	1	0.1	0.5133
	LR715	29	101.1	Intact(150)	recombinase,integrase,lysin,tail,capsid,terminase	1120-102287	1	136	100	36	100	0	Yes	10	PHAGE_Salmon_SSU5_NC_018843(91)	90	0.6691	0.5099
	LR715	33	20.9	Intact(150)	terminase,capsid,head,tail,lysis,plate	857-21846	0	24	24	0	100	0	No	2	PHAGE_Salmon_RE_2010_NC_019488(23)	23	0.9583	0.5608
ST12	LR721	1	14.8	Incomplete(40)	integrase,capsid	405037-419912	0	18	8	10	100	0	Yes	8	PHAGE_Xantho_Xop411_NC_009543(2)	1	0.1111	0.5244
	LR721	10	36.1	Intact(150)	tail,integrase,portal,terminase,capsid	128-36238	0	46	38	8	100	0	Yes	12	PHAGE_Aeromo_phiO18P_NC_009542(18)	15	0.3913	0.5581
	LR721	17	23.9	Intact(150)	integrase,portal,terminase,capsid,tail,lysis,lysin,plate	15770-39717	0	33	30	3	100	0	Yes	3	PHAGE_Salmon_Fels_2_NC_010463(28)	28	0.8484	0.5278
ST1, CC1	LR722	5	49.9	Intact(140)	integrase,portal,terminase,capsid,tail	14701-64605	0	44	34	10	100	0	Yes	12	PHAGE_Haemop_HP2_NC_003315(17)	17	0.3863	0.5459
	LR722	7	15.1	Incomplete(20)	integrase	302062-317215	0	12	11	1	100	0	Yes	7	PHAGE_Cronob_phiES15_NC_018454(5)	5	0.4166	0.5202
	LR722	18	21.3	Incomplete(40)	integrase,terminase,head	96543-117851	0	17	14	3	100	0	Yes	10	PHAGE_Cronob_ENT47670_NC_019927(4)	4	0.2352	0.5584
	LR722	43	48.7	Intact(150)	head,terminase,portal,tail,integrase,capsid	9-48730	0	72	55	17	100	0	Yes	29	PHAGE_Entero_ES18_NC_006949(14)	13	0.1944	0.5039
ST1, CC1	LR723	4	40.6	Intact(150)	integrase,lysis,terminase,portal,capsid,head,tail,plate	40131-80818	0	47	36	11	100	0	Yes	18	PHAGE_Salmon_118970_sal3_NC_031940(14)	9	0.2978	0.5144
	LR723	6	20.5	Incomplete(20)	integrase	203-20707	0	39	25	14	100	0	Yes	18	PHAGE_Cronob_ENT47670_NC_019927(6)	7	0.1538	0.5231
	LR723	7	43.4	Intact(150)	head,integrase,tail,portal,terminase,lysin	203-43658	2	61	46	15	100	0	Yes	26	PHAGE_Salmon_118970_sal3_NC_031940(11)	11	0.1803	0.5443
	LR723	10	19.7	Incomplete(40)	tail	114582-134376	0	22	19	3	100	0	No	2	PHAGE_Cronob_ENT47670_NC_019927(18)	18	0.8181	0.5035
	LR723	11	43.5	Intact(130)	integrase,portal,terminase,capsid,tail	204314-247832	0	36	30	6	100	0	Yes	10	PHAGE_Haemop_HP2_NC_003315(18)	18	0.5	0.5563
ST1, CC1	LR728	7	57.6	Intact(120)	integrase,portal,terminase,capsid,tail	2012-59668	0	33	30	3	100	0	Yes	11	PHAGE_Haemop_HP2_NC_003315(17)	17	0.5151	0.5532
	LR728	8	61.6	Intact(150)	capsid,integrase,tail,portal,terminase,head	25318-86943	0	74	57	17	100	0	Yes	30	PHAGE_Entero_ES18_NC_006949(16)	14	0.2162	0.5177
	LR728	19	12.1	Incomplete(30)	head,integrase	102760-114886	0	10	7	3	100	0	Yes	2	PHAGE_Entero_P4_NC_001609(6)	6	0.6	0.4685
	LR728	43	46.4	Intact(150)	head,tail,capsid,portal,terminase,lysis,integrase	698-47192	0	45	32	13	100	0	Yes	19	PHAGE_Cronob_phiES15_NC_018454(9)	9	0.2	0.5214
ST1, CC1	LR733	1	43.5	Intact(130)	integrase,portal,terminase,capsid,tail	207699-251217	0	36	30	6	100	0	Yes	10	PHAGE_Haemop_HP2_NC_003315(18)	18	0.5	0.5563
	LR733	28	20.5	Incomplete(20)	integrase	155798-176302	0	39	25	14	100	0	Yes	18	PHAGE_Cronob_ENT47670_NC_019927(6)	7	0.1538	0.5231
	LR733	3	47.8	Intact(150)	integrase,lysin,terminase,portal,head,tail	257896-305778	2	60	46	14	100	0	Yes	26	PHAGE_Salmon_118970_sal3_NC_031940(11)	11	0.1833	0.5475
	LR733	6	14.9	Incomplete(40)	tail	2-14950	0	17	15	2	100	0	No	2	PHAGE_Cronob_ENT47670_NC_019927(14)	14	0.8235	0.5225
	LR733	6	40.6	Intact(150)	integrase,lysis,terminase,portal,capsid,head,tail,plate	174146-214833	0	47	36	11	100	0	Yes	18	PHAGE_Salmon_118970_sal3_NC_031940(14)	9	0.2978	0.5144
ST1, CC1	LR735	12	15.4	questionable(80)	tail,capsid,terminase,portal,integrase	227724-243135	0	19	16	3	100	0	Yes	8	PHAGE_Vibrio_K139_NC_003313(7)	6	0.3684	0.5409
	LR735	17	46.6	Intact(100)	integrase,tail,head,terminase	45231-91902	0	65	52	13	100	0	No	23	PHAGE_Cronob_ENT47670_NC_019927(26)	26	0.4	0.512
	LR735	21	14	Incomplete(40)	head,terminase,integrase	19547-33549	0	19	16	3	100	0	Yes	11	PHAGE_Cronob_ENT47670_NC_019927(5)	5	0.2631	0.5267
	LR735	28	42.1	Intact(150)	tail,plate,head,capsid,portal,terminase,lysis,integrase	93509-135648	0	45	36	9	100	0	Yes	18	PHAGE_Salmon_118970_sal3_NC_031940(14)	9	0.3111	0.5166
	LR735	38	29.7	Intact(150)	lysin,terminase,portal,head,tail	304-30077	2	41	35	6	100	0	No	17	PHAGE_Salmon_118970_sal3_NC_031940(12)	8	0.2926	0.5482
	LR735	44	10.8	Incomplete(50)	virion,transposase	36247-47124	0	11	9	2	100	0	No	6	PHAGE_Acinet_vB_AbaM_ME3_NC_041884(3)	4	0.2727	0.4972
ST4, CC4	LR706	13	36.5	Incomplete(60)	integrase,capsid	6060-42657	0	23	9	14	100	0	Yes	9	PHAGE_Xantho_Xp10_NC_004902(2)	1	0.0869	0.5133
	LR706	17	59	intact(110)	tail,head,terminase,lysin,integrase,transposase	128141-187188	1	76	58	18	100	0	Yes	25	PHAGE_Cronob_ENT47670_NC_019927(30)	30	0.3947	0.5135
	LR706	17	8.9	Incomplete(40)	transposase,virion	185686-194675	0	12	7	5	100	0	No	7	PHAGE_Entero_P1_NC_005856(2)	1	0.1666	0.6021
	LR706	18	101.3	Intact(150)	recombinase,terminase,capsid,tail,lysin,integrase	1-101341	1	124	95	29	100	0	Yes	8	PHAGE_Salmon_SSU5_NC_018843(88)	87	0.7096	0.5107
	LR706	30	20.9	Intact(150)	terminase,capsid,head,tail,lysis,plate	856-21845	0	24	24	0	100	0	No	2	PHAGE_Salmon_RE_2010_NC_019488(23)	23	0.9583	0.5608
ST1, CC1	LR736	15	22.4	Questionable(80)	integrase,portal,terminase,capsid,tail	68063-90528	0	19	16	3	100	0	Yes	8	PHAGE_Aeromo_phiO18P_NC_009542(7)	6	0.3684	0.5326
	LR736	17	14	Incomplete(40)	head,terminase,integrase	404009-418011	0	20	15	5	100	0	Yes	10	PHAGE_Cronob_ENT47670_NC_019927(5)	5	0.25	0.5267
	LR736	24	46.6	Intact(100)	terminase,head,tail,integrase	600-47271	0	66	53	13	100	0	No	23	PHAGE_Cronob_ENT47670_NC_019927(27)	27	0.409	0.512
	LR736	25	40.2	Intact(150)	integrase,lysis,terminase,portal,capsid,head,tail,plate	40116-80396	0	49	37	12	100	0	Yes	19	PHAGE_Salmon_118970_sal3_NC_031940(14)	9	0.2857	0.5141
	LR736	32	35.4	Intact(150)	lysin,terminase,portal,head,tail	305-35745	2	45	39	6	100	0	No	18	PHAGE_Salmon_118970_sal3_NC_031940(12)	11	0.2666	0.5465
ST4, CC4	LR745	8	19.5	Incomplete(30)	integrase,lysis	286444-306023	0	21	18	3	100	0	Yes	11	PHAGE_Cronob_phiES15_NC_018454(8)	8	0.3809	0.4676
	LR745	8	19.3	Intact(110)	terminase,portal,capsid,head,tail,plate	305155-324468	0	21	21	0	100	0	No	7	PHAGE_Salmon_118970_sal3_NC_031940(19)	11	0.9047	0.5592
	LR745	24	29.4	Intact(150)	tail,head,portal,terminase,lysis,lysin	1-29420	0	41	34	7	100	0	No	15	PHAGE_Salmon_118970_sal3_NC_031940(11)	9	0.2682	0.5542
	LR745	35	8.9	Incomplete(40)	transposase,virion	137-9126	0	11	6	5	100	0	No	6	PHAGE_Prochl_P_SSM3_NC_021559(1)	1	0.0909	0.6018
ST13, CC13	LR747	2	101.7	Intact(150)	recombinase,integrase,lysin,tail,capsid,terminase	1-101799	1	133	101	32	100	0	Yes	11	PHAGE_Salmon_SSU5_NC_018843(89)	90	0.6691	0.5109
	LR747	18	11.2	Questionable(75)	head,integrase	53315-64556	0	12	9	3	100	0	Yes	3	PHAGE_Entero_P4_NC_001609(7)	7	0.5833	0.4973
	LR747	23	16.3	Incomplete(30)	tail,integrase	20419-36748	0	14	12	2	100	0	Yes	3	PHAGE_Cronob_ENT47670_NC_019927(10)	10	0.7142	0.4905
	LR747	29	26.4	Intact(150)	integrase,portal,terminase,capsid,tail,lysis,lysin,plate	78593-105079	0	32	30	2	100	0	Yes	3	PHAGE_Salmon_Fels_2_NC_010463(28)	28	0.875	0.5278
	LR747	30	13.3	Incomplete(60)	tail,terminase,lysis	95040-108435	0	20	13	7	100	0	No	7	PHAGE_Cronob_phiES15_NC_018454(7)	7	0.35	0.4634
	LR747	31	35.2	Intact(120)	head,lysis,terminase,portal,capsid,plate,tail	116-35395	0	50	45	5	100	0	No	24	PHAGE_Edward_GF_2_NC_026611(17)	17	0.34	0.5075
	LR747	38	37.9	Intact(130)	integrase,lysin,terminase,capsid,tail	39853-77829	0	55	46	9	100	0	Yes	7	PHAGE_Cronob_phiES15_NC_018454(40)	40	0.7272	0.5441
ST4, CC4	LR751	1	11.4	Questionable(75)	integrase,head	44009-55503	0	13	9	4	100	0	Yes	3	PHAGE_Entero_P4_NC_001609(7)	7	0.5384	0.4799
	LR751	6	12.8	Incomplete(20)	lysis	71-12931	0	24	18	6	100	0	No	13	PHAGE_Cronob_ENT47670_NC_019927(5)	5	0.2083	0.5045
	LR751	25	33.2	Questionable(75)	integrase,head	73846-107076	0	14	10	4	100	0	Yes	3	PHAGE_Entero_P4_NC_001609(7)	8	0.5	0.5061
	LR751	37	24.7	Intact(100)	flippase,tail,plate,capsid,head,portal,terminase	38480-63258	0	28	27	1	100	0	No	9	PHAGE_Edward_GF_2_NC_026611(16)	16	0.5714	0.499
	LR751	46	11.6	Incomplete(20)	lysin	24-11699	0	19	16	3	100	0	No	13	PHAGE_Cronob_ENT47670_NC_019927(4)	4	0.2105	0.508
ST1, CC1	LR752	3	17.6	Questionable(80)	terminase,head,injection,flippase,integrase	163-17856	0	16	15	1	100	0	Yes	10	PHAGE_Shigel_Sf6_NC_005344(5)	5	0.3125	0.4677
	LR752	23	43.4	Intact(100)	tail,portal,terminase,lysis,integrase	97567-141004	0	36	28	8	100	0	Yes	17	PHAGE_Cronob_phiES15_NC_018454(9)	9	0.25	0.5189
	LR752	25	39.5	Intact(150)	tail,head,portal,terminase,lysis,lysin,plate,integrase	179270-218863	0	46	37	9	100	0	Yes	17	PHAGE_Salmon_118970_sal3_NC_031940(12)	8	0.2608	0.5338
ST31, CC31	LR753	4	54.5	Intact(97)	tail,head,terminase,lysis	83287-137799	1	74	54	20	100	0	Yes	22	PHAGE_Cronob_ENT47670_NC_019927(30)	30	0.4054	0.5264
	LR753	81	41.6	Intact(100)	tail,plate,capsid,head,portal,terminase	8849-50486	0	60	52	8	100	0	No	26	PHAGE_Edward_GF_2_NC_026611(16)	16	0.2666	0.5055
ST1, CC1	LR755	5	12.1	Incomplete(30)	integrase,head	27814-39940	0	10	7	3	100	0	Yes	2	PHAGE_Entero_P4_NC_001609(6)	6	0.6	0.4685
	LR755	6	57.6	Intact(120)	tail,terminase,capsid,portal,integrase	600760-658416	0	37	29	8	100	0	Yes	11	PHAGE_Haemop_HP2_NC_003315(17)	17	0.4594	0.5532
	LR755	16	46.4	Intact(140)	tail,head,capsid,portal,terminase,lysis,integrase	61111-107605	0	40	31	9	100	0	Yes	18	PHAGE_Cronob_phiES15_NC_018454(9)	9	0.225	0.5214
	LR755	21	61.6	Intact(150)	capsid,integrase,tail,portal,terminase,head	3322-64947	0	74	57	17	100	0	Yes	30	PHAGE_Entero_ES18_NC_006949(16)	14	0.2162	0.5177
ST13, CC13	LR757	1	16.3	Incomplete(30)	integrase,tail	26991-43320	0	11	9	2	100	0	Yes	2	PHAGE_Cronob_ENT47670_NC_019927(8)	8	0.7272	0.4904
	LR757	1	44.8	Intact(140)	integrase,recombinase,head,lysis,terminase,portal,capsid,plate,tail	321687-366519	0	61	54	7	100	0	Yes	28	PHAGE_Edward_GF_2_NC_026611(17)	17	0.2786	0.5063
	LR757	55	11.2	Questionable(75)	integrase,head	2453-13694	0	10	9	1	100	0	Yes	3	PHAGE_Entero_P4_NC_001609(7)	7	0.7	0.4973
	LR757	55	54.4	Intact(130)	tail,capsid,terminase,lysin,integrase	50315-104811	0	57	49	8	100	0	Yes	11	PHAGE_Cronob_phiES15_NC_018454(39)	39	0.6842	0.5567
	LR757	13	13.3	Incomplete(60)	lysis,terminase,tail	309708-323103	0	20	13	7	100	0	no	7	PHAGE_Cronob_phiES15_NC_018454(7)	7	0.35	0.4634
	LR757	15	25.4	Intact(150)	plate,tail,lysin,lysis,terminase,capsid,portal,integrase	1060-26469	0	31	28	3	100	0	Yes	3	PHAGE_Salmon_Fels_2_NC_010463(26)	26	0.8387	0.5274
ST219, CC155	O21_13	8	54.8	Intact(120)	tail,terminase,capsid,portal,integrase	1232-56066	0	34	29	5	100	0	Yes	10	PHAGE_Haemop_HP1_NC_001697(17)	16	0.5	0.5621
	O21_13	15	50.6	Intact(130)	integrase,lysin,terminase,portal,coat,capsid,head,injection,tail	20995-71653	0	63	51	12	100	0	Yes	28	PHAGE_Cronob_ENT47670_NC_019927(12)	12	0.1904	0.5055
	O21_13	27	35	Intact(150)	tail,plate,lysin,lysis,terminase,capsid,portal,integrase	43821-78893	0	49	42	7	100	0	Yes	4	PHAGE_Salmon_Fels_2_NC_010463(38)	38	0.7755	0.5205
	O21_13	27	41	Intact(150)	tail,head,portal,terminase,lysin,integrase	85667-126689	0	48	38	10	100	0	Yes	20	PHAGE_Salmon_118970_sal3_NC_031940(11)	8	0.2291	0.5451
ST99, CC99	O21_16	7	44.6	Questionable(89)	lysis,flippase,head,integrase	145943-190611	0	60	45	15	100	0	Yes	14	PHAGE_Entero_Tyrion_NC_031077(31)	31	0.5166	0.5444
	O21_16	7	26.5	Intact(150)	head,tail,plate,capsid,portal,terminase,lysis	265067-291651	0	39	30	9	100	0	No	15	PHAGE_Salmon_118970_sal3_NC_031940(17)	10	0.4358	0.5355
	O21_16	7	33.6	Incomplete(30)	integrase	284242-317894	0	12	10	2	100	0	Yes	5	PHAGE_Cronob_phiES15_NC_018454(6)	6	0.5	0.5043
	O21_16	9	25.2	Intact(100)	tail,terminase,capsid,portal	373224-398483	0	31	27	4	100	0	No	9	PHAGE_Haemop_HP1_NC_001697(17)	16	0.5483	0.5662
	O21_16	20	37.3	Intact(150)	tail,plate,lysin,lysis,terminase,capsid,portal,integrase	43812-81149	0	48	42	6	100	0	Yes	6	PHAGE_Salmon_Fels_2_NC_010463(36)	36	0.75	0.5137
ST226, CC8	O26_4	1	16.2	Incomplete(50)	integrase,lysis,terminase,tail	733857-750132	0	16	10	6	100	0	Yes	8	PHAGE_Cronob_ENT47670_NC_019927(3)	3	0.1875	0.4928
	O26_4	7	8.2	Incomplete(30)	recombinase,plate	575-8827	1	9	6	3	100	0	No	6	PHAGE_Caulob_karma_NC_019410(1)	1	0.1111	0.5654
	O26_4	17	51.3	Questionable(70)	recombinase,integrase,tail	3-51316	1	86	56	30	100	0	Yes	8	PHAGE_Salmon_SSU5_NC_018843(52)	49	0.6046	0.4774
ST1,CC1	WNTSBCO4	48	11	Questionable(70)	integrase,tail	116904-127963	0	17	16	1	100	0	Yes	9	PHAGE_Entero_HK446_NC_019714(5)	5	0.2941	0.5467
	WNTSBCO4	18	48.4	Intact(150)	tail,head,portal,terminase,lysin,plate,integrase	1-48453	2	52	39	13	100	0	Yes	20	PHAGE_Salmon_118970_sal3_NC_031940(13)	9	0.25	0.5398
ST13, CC13	LR756	3	13.3	Incomplete(60)	tail,terminase,lysis	122025-135420	0	20	13	7	100	0	No	7	PHAGE_Cronob_phiES15_NC_018454(7)	7	0.35	0.4634
	LR756	4	25.4	Intact(150)	integrase,portal,terminase,capsid,tail,lysis,lysin,plate	90164-115586	0	31	29	2	100	0	Yes	3	PHAGE_Salmon_Fels_2_NC_010463(27)	27	0.8709	0.5274
	LR756	9	37.9	Intact(130)	integrase,lysin,terminase,capsid,tail	1-37977	0	50	45	5	100	0	Yes	6	PHAGE_Cronob_phiES15_NC_018454(40)	40	0.8	0.5441
	LR756	12	11.2	Questionable(75)	head,integrase	53316-64557	0	11	9	2	100	0	Yes	3	PHAGE_Entero_P4_NC_001609(7)	7	0.6363	0.4973
	LR756	18	40.8	Intact(140)	integrase,recombinase,head,lysis,terminase,portal,capsid,plate,tail	75534-116337	0	68	56	12	100	0	Yes	30	PHAGE_Edward_GF_2_NC_026611(17)	17	0.25	0.515
	LR756	29	16.3	Incomplete(30)	integrase,tail	26992-43321	0	15	13	2	100	0	Yes	3	PHAGE_Cronob_ENT47670_NC_019927(11)	11	0.7333	0.4904
ST226, CC8	O23mB	17	14.2	Incomplete(30)	recombinase,plate	5008-19291	1	12	6	6	100	0	Yes	6	PHAGE_Caulob_karma_NC_019410(1)	1	0.0833	0.5569
	O23mB	28	30.7	Incomplete(60)	tail,terminase,lysis,integrase	40644-71389	0	16	10	6	100	0	Yes	8	PHAGE_Cronob_ENT47670_NC_019927(3)	3	0.1875	0.5268
	O23mB	37	48.5	Questionable(70)	tail,recombinase,integrase	1271-49809	0	81	56	25	100	0	Yes	8	PHAGE_Salmon_SSU5_NC_018843(52)	49	0.6419	0.4807
ST99, CC99	O26_1	4	44.6	Questionable(89)	lysis,flippase,head,integrase	145607-190275	0	60	45	15	100	0	Yes	14	PHAGE_Entero_Tyrion_NC_031077(31)	31	0.5166	0.5444
	O26_1	4	26.5	Intact(150)	head,tail,plate,capsid,portal,terminase,lysis	264731-291315	0	39	30	9	100	0	No	15	PHAGE_Salmon_118970_sal3_NC_031940(17)	10	0.4358	0.5355
	O26_1	4	33.6	Incomplete(30)	integrase	283906-317558	0	12	10	2	100	0	Yes	5	PHAGE_Cronob_phiES15_NC_018454(6)	6	0.5	0.5043
	O26_1	6	55.3	Intact(120)	tail,terminase,capsid,portal,integrase	373381-428700	0	34	29	5	100	0	Yes	10	PHAGE_Haemop_HP1_NC_001697(17)	16	0.5	0.5614
	O26_1	25	37.8	Intact(150)	integrase,portal,terminase,capsid,tail,lysis,lysin,plate	24881-62738	0	49	43	6	100	0	Yes	6	PHAGE_Salmon_Fels_2_NC_010463(37)	37	0.7551	0.5101
