# Supplementary material for: Characterization of Cronobacter sakazakii Strains Originating from Plant-Origin Foods Using Comparative Genomic Analyses and Zebrafish Infectivity Studies
Source: Microorganisms. 2022 Jul 11;10(7):1396. doi: 10.3390/microorganisms10071396 (PMC9319161; doi:10.3390/microorganisms10071396)
Supplement: Supplementary file 1 [file microorganisms-10-01396-s001.zip › S4_Supplemental Table S4. COG final May2022.xlsx]

## Sheet: Sheet1
Supplemental Table S4. Number of genes associated with COG category present in each individual plant-associated C. sakazakii strainsa
Code	MOD1_LR607	MOD1_LR626	MOD1_LR627	MOD1_LR636	MOD1_LR637	MOD1_LR639	MOD1_LR641	MOD1_LR643	MOD1_LR646	MOD1_LR688	MOD1_LR702	MOD1_LR703	MOD1_LR704	MOD1_LR705	MOD1_LR706	MOD1_LR711	MOD1_LR712	MOD1_LR713	MOD1_LR714	MOD1_LR721	MOD1_LR723	MOD1_LR728	MOD1_LR735	MOD1_LR736	MOD1_LR745	MOD1_LR747	MOD1_LR751	MOD1_LR755	MOD1_LR756	MOD1_Jor100	MOD1_Jor175	MOD1_Jor204	MOD1_KW9	SUM	AVG Value	AVG (%)
A	1	1	1	1	1	1	1	1	1	1	1	1	1	1	1	1	1	1	1	1	1	1	1	1	1	1	1	1	1	1	1	1	1	33	1	0.0259051
B	0	0	0	0	0	0	0	0	0	0	0	0	0	0	0	0	0	0	0	0	0	0	0	0	0	0	0	0	0	0	0	0	0	0	0	0
C	210	209	210	210	210	214	208	209	207	211	213	211	210	208	211	215	209	211	215	211	211	214	217	216	212	211	210	215	210	211	210	211	213	6973	211.303	5.47383
D	47	47	46	41	41	48	43	44	43	45	43	43	45	44	44	48	43	44	48	42	45	48	46	46	44	46	43	48	44	42	45	43	43	1472	44.6061	1.15552
E	294	294	294	294	294	296	293	290	288	293	290	291	293	288	288	292	288	291	295	295	294	296	294	294	295	294	292	294	292	292	293	291	293	9655	292.576	7.57921
F	98	102	99	102	102	99	102	99	99	99	99	99	99	103	103	99	103	99	99	100	99	99	100	100	99	102	99	99	99	99	99	99	102	3299	99.9697	2.58973
G	329	323	323	329	329	328	324	324	323	323	324	326	323	326	328	325	327	332	327	328	323	329	326	328	333	338	330	327	337	334	321	333	329	10809	327.545	8.4851
H	139	142	140	139	139	141	142	138	139	140	139	139	140	141	142	141	142	139	141	139	140	140	140	140	139	142	138	141	139	139	139	139	142	4620	140	3.62672
I	80	80	78	80	80	79	79	81	81	79	78	78	79	78	78	79	78	78	79	77	79	79	79	79	78	80	79	79	80	78	79	80	80	2608	79.0303	2.04729
J	181	177	176	179	179	179	176	181	180	179	178	180	178	181	180	179	181	181	179	182	181	178	179	179	182	182	181	181	183	180	179	181	180	5932	179.758	4.65664
K	302	294	291	296	296	300	302	297	296	287	312	296	288	297	297	299	299	302	300	292	292	298	305	305	312	310	297	300	308	294	290	297	299	9850	298.485	7.73228
L	194	181	171	174	175	184	187	184	183	165	204	172	165	191	195	183	187	174	183	176	175	183	210	207	203	202	170	183	190	163	166	158	192	6030	182.727	4.73357
M	262	259	251	256	257	253	258	260	262	253	264	259	252	262	262	253	260	263	253	261	255	253	259	258	258	264	260	253	265	261	252	262	272	8532	258.545	6.69765
N	65	65	65	67	68	65	67	70	69	64	70	68	65	68	67	62	66	69	65	68	65	64	66	66	68	66	66	65	67	66	65	66	72	2195	66.5152	1.72308
O	157	149	147	152	152	151	154	152	152	148	158	152	148	150	150	151	150	154	151	148	152	149	154	154	157	154	150	151	153	147	146	150	150	4993	151.303	3.91952
P	247	247	251	239	239	256	240	244	243	249	264	241	249	246	247	255	246	242	254	240	250	255	255	257	254	246	241	254	245	241	247	240	240	8164	247.394	6.40877
Q	45	44	45	44	44	45	43	45	45	45	44	44	45	45	45	45	45	43	45	43	45	45	45	45	45	45	44	45	45	44	45	44	45	1471	44.5758	1.15474
R	0	0	0	0	0	0	0	0	0	0	0	0	0	0	0	0	0	0	0	0	0	0	0	0	0	0	0	0	0	0	0	0	0	0	0	0
S	1101	1094	1013	1042	1041	1102	1057	1052	1048	1022	1127	1029	1026	1014	1016	1100	1007	1046	1101	1008	1073	1099	1148	1147	1045	1093	988	1104	1053	962	996	986	1093	34833	1055.55	27.344
T	157	162	161	153	153	162	152	155	155	161	158	152	161	157	157	160	156	155	162	152	163	160	169	169	159	159	154	163	157	157	160	151	153	5215	158.03	4.09379
U	77	64	60	61	62	67	63	66	65	61	74	63	61	65	63	67	63	65	67	64	61	66	72	73	82	71	71	67	71	65	64	63	69	2193	66.4545	1.72151
V	47	46	47	47	46	48	50	48	48	52	47	47	52	49	48	48	49	45	48	50	52	48	54	54	47	45	47	48	45	49	46	50	48	1595	48.3333	1.25208
-	0	0	0	0	0	0	0	0	0	0	0	0	0	0	0	0	0	0	0	0	0	0	0	0	0	0	0	0	0	0	0	0	0	0	0	0
TOTALb	3854	3887	3778	3814	3815	3925	3850	3848	3837	3788	3994	3802	3790	3827	3836	3910	3815	3841	3920	3789	3864	3914	4025	4024	3922	3960	3774	3925	3893	3734	3753	3756	3924	127388	3860.24	100
a Annotation of the genes was processed through the eggNOG database at the European Molecular Biology Laboratory (EMBL, http://eggnogdb.embl.de/#/app/emapper) using the default settings.
b The total is the total number of proeitn coding genes in the genome from eggNOG emapper output results.
